# Supplementary material for: Biomarkers That Correlate with Active Pulmonary Tuberculosis Treatment Response: a Systematic Review and Meta-analysis
Source: PubMed Central journal article supplement (PMC8849205; doi:10.1128/jcm.01859-21), 2022-02-16
Supplement: jcm.01859-21-s0001.pdf [file jcm.01859-21-s0001.pdf]

|    |                                                                                                                                                       |
|----|-------------------------------------------------------------------------------------------------------------------------------------------------------|
| 1  | <b>Supplementary file</b>                                                                                                                             |
| 2  |                                                                                                                                                       |
| 3  | <b>Table of contents</b>                                                                                                                              |
| 4  |                                                                                                                                                       |
| 5  | <b>Table S1: PRISMA Checklist</b>                                                                                                                     |
| 6  |                                                                                                                                                       |
| 7  | <b>S2: Search strategy</b>                                                                                                                            |
| 8  |                                                                                                                                                       |
| 9  | <b>Table S3: QUADS-2 guiding questions</b>                                                                                                            |
| 10 |                                                                                                                                                       |
| 11 | <b>Figure S4: Study-specific QUADAS-2 scores</b>                                                                                                      |
| 12 |                                                                                                                                                       |
| 13 | <b>Table S5: Complete list of studies and biomarkers included in qualitative analysis</b>                                                             |
| 14 |                                                                                                                                                       |
| 15 | <b>Table S6: Full list of studies and references included in the quantitative fold-change analyses</b>                                                |
| 16 |                                                                                                                                                       |
| 17 |                                                                                                                                                       |
| 18 | <b>Figure S7: Fold-changes plots for individual studies of CRP, IP-10, IL-6 and TNF-<math>\alpha</math></b>                                           |
| 19 |                                                                                                                                                       |
| 20 | <b>Table S8: Sensitivity analysis for the weekly fold-change meta-regression with varying correlation coefficient (<math>\rho</math>) parameter</b>   |
| 21 |                                                                                                                                                       |
| 22 |                                                                                                                                                       |
| 23 | <b>Table S9: Meta-analysis of outcome is the fold-change from previous recorded timepoint sensitivity analysis for CRP (excluding Ferrian et al.)</b> |
| 24 |                                                                                                                                                       |
| 25 |                                                                                                                                                       |
| 26 | <b>Table S10: Meta-regression where the outcome is the fold-change from baseline and the predictor is treatment duration.</b>                         |
| 27 |                                                                                                                                                       |
| 28 |                                                                                                                                                       |

**Table S1: PRISMA Checklist**

| Section/topic             | #  | Checklist item                                                                                                                                                                                                                                                                                              | Reported on page # |
|---------------------------|----|-------------------------------------------------------------------------------------------------------------------------------------------------------------------------------------------------------------------------------------------------------------------------------------------------------------|--------------------|
| <b>TITLE</b>              |    |                                                                                                                                                                                                                                                                                                             |                    |
| Title                     | 1  | Identify the report as a systematic review, meta-analysis, or both.                                                                                                                                                                                                                                         | p.1                |
| <b>ABSTRACT</b>           |    |                                                                                                                                                                                                                                                                                                             |                    |
| Structured summary        | 2  | Provide a structured summary including, as applicable: background; objectives; data sources; study eligibility criteria, participants, and interventions; study appraisal and synthesis methods; results; limitations; conclusions and implications of key findings; systematic review registration number. | p.2                |
| <b>INTRODUCTION</b>       |    |                                                                                                                                                                                                                                                                                                             |                    |
| Rationale                 | 3  | Describe the rationale for the review in the context of what is already known.                                                                                                                                                                                                                              | p.4                |
| Objectives                | 4  | Provide an explicit statement of questions being addressed with reference to participants, interventions, comparisons, outcomes, and study design (PICOS).                                                                                                                                                  | p.5                |
| <b>METHODS</b>            |    |                                                                                                                                                                                                                                                                                                             |                    |
| Protocol and registration | 5  | Indicate if a review protocol exists, if and where it can be accessed (e.g., Web address), and, if available, provide registration information including registration number.                                                                                                                               |                    |
| Eligibility criteria      | 6  | Specify study characteristics (e.g., PICOS, length of follow-up) and report characteristics (e.g., years considered, language, publication status) used as criteria for eligibility, giving rationale.                                                                                                      | p.6                |
| Information sources       | 7  | Describe all information sources (e.g., databases with dates of coverage, contact with study authors to identify additional studies) in the search and date last searched.                                                                                                                                  | p.5                |
| Search                    | 8  | Present full electronic search strategy for at least one database, including any limits used, such that it could be repeated.                                                                                                                                                                               | Supplement S2      |
| Study selection           | 9  | State the process for selecting studies (i.e., screening, eligibility, included in systematic review, and, if applicable, included in the meta-analysis).                                                                                                                                                   | p.6                |
| Data collection process   | 10 | Describe method of data extraction from reports (e.g., piloted forms, independently, in duplicate) and any processes for obtaining and confirming data from investigators.                                                                                                                                  | p.6-7              |

|                                    |    |                                                                                                                                                                                                                        |                               |
|------------------------------------|----|------------------------------------------------------------------------------------------------------------------------------------------------------------------------------------------------------------------------|-------------------------------|
| Data items                         | 11 | List and define all variables for which data were sought (e.g., PICOS, funding sources) and any assumptions and simplifications made.                                                                                  | p.7                           |
| Risk of bias in individual studies | 12 | Describe methods used for assessing risk of bias of individual studies (including specification of whether this was done at the study or outcome level), and how this information is to be used in any data synthesis. | p.7-8                         |
| Summary measures                   | 13 | State the principal summary measures (e.g., risk ratio, difference in means).                                                                                                                                          | p.8-9                         |
| Synthesis of results               | 14 | Describe the methods of handling data and combining results of studies, if done, including measures of consistency (e.g., $I^2$ ) for each meta-analysis.                                                              | p.9                           |
| Risk of bias across studies        | 15 | Specify any assessment of risk of bias that may affect the cumulative evidence (e.g., publication bias, selective reporting within studies).                                                                           | p.7-8                         |
| Additional analyses                | 16 | Describe methods of additional analyses (e.g., sensitivity or subgroup analyses, meta-regression), if done, indicating which were pre-specified.                                                                       | p.9-10                        |
| <b>RESULTS</b>                     |    |                                                                                                                                                                                                                        |                               |
| Study selection                    | 17 | Give numbers of studies screened, assessed for eligibility, and included in the review, with reasons for exclusions at each stage, ideally with a flow diagram.                                                        | p.10                          |
| Study characteristics              | 18 | For each study, present characteristics for which data were extracted (e.g., study size, PICOS, follow-up period) and provide the citations.                                                                           | Figure 1, 11                  |
| Risk of bias within studies        | 19 | Present data on risk of bias of each study and, if available, any outcome level assessment (see item 12).                                                                                                              | Figure 2, p.13                |
| Results of individual studies      | 20 | For all outcomes considered (benefits or harms), present, for each study: (a) simple summary data for each intervention group (b) effect estimates and confidence intervals, ideally with a forest plot.               | Table 2, Supplement S6        |
| Synthesis of results               | 21 | Present results of each meta-analysis done, including confidence intervals and measures of consistency.                                                                                                                | Table 3, p. 21                |
| Risk of bias across studies        | 22 | Present results of any assessment of risk of bias across studies (see Item 15).                                                                                                                                        | Figure 2, p.14, Supplement S4 |
| Additional analysis                | 23 | Give results of additional analyses, if done (e.g., sensitivity or subgroup analyses, meta-regression [see Item 16]).                                                                                                  | Supplement S8, S9             |

| <b>DISCUSSION</b>   |    |                                                                                                                                                                                      |            |
|---------------------|----|--------------------------------------------------------------------------------------------------------------------------------------------------------------------------------------|------------|
| Summary of evidence | 24 | Summarize the main findings including the strength of evidence for each main outcome; consider their relevance to key groups (e.g., healthcare providers, users, and policy makers). | p.22-23    |
| Limitations         | 25 | Discuss limitations at study and outcome level (e.g., risk of bias), and at review-level (e.g., incomplete retrieval of identified research, reporting bias).                        | p.24       |
| Conclusions         | 26 | Provide a general interpretation of the results in the context of other evidence, and implications for future research.                                                              | p.22, p.24 |
| <b>FUNDING</b>      |    |                                                                                                                                                                                      |            |
| Funding             | 27 | Describe sources of funding for the systematic review and other support (e.g., supply of data); role of funders for the systematic review.                                           | p.26       |

31  
32  
33  
34  
35

From: Moher D, Liberati A, Tetzlaff J, Altman DG, The PRISMA Group (2009). Preferred Reporting Items for Systematic Reviews and Meta-Analyses: The PRISMA Statement. PLoS Med 6(7): e1000097. doi:10.1371/journal.pmed1000097

36 **S2: Search strategy**

37

38 Search conducted in April 2019 with an updated search in October 2020:

39

40 ((((((*"tuberculosis"*[mh] OR *"mycobacterium tuberculosis"*[mh] OR *"tuberculosis"*[tiab] OR  
 41 *tb*[tiab] OR *MDRTB*[tw] OR *"Antitubercular Agents"*[mh] OR *antitubercul\**[tw]))) AND  
 42 *((monitor\**[tw] OR *infectiousness*[tiab] OR *treatment outcome\**[tiab] OR *treatment re-*  
 43 *sponse\**[tiab] OR *"treatment outcome"*[mh] OR *"microbial viability"*[mh] OR  
 44 *viab\**[tiab]))) AND *((*"biomarkers/blood"*[mh] OR *biomarker\**[tw] OR *immunologic**  
 45 *test\**[tw] OR *eth-idium*[tw] OR *"propidium"*[tw] OR *"RNA"*[tw] OR *mRNA*[tw] OR  
 46 *"DNA"*[tw] OR *lympho-cyte\**[tw] OR *Fluorescein Diacetate*[tw] OR *(t cell activation*  
 47 *marker\**[tw] AND *assay\*)* OR *gamma assay\**[tw])))

48

49

50 **Table S3: QUADS-2 guiding questions**

51

| Domain             | Guiding questions                                                                                                                                                                                                                                                           |
|--------------------|-----------------------------------------------------------------------------------------------------------------------------------------------------------------------------------------------------------------------------------------------------------------------------|
| Patient selection  | <ul style="list-style-type: none"> <li>• Was a consecutive or random sample of patients or specimens enrolled?</li> <li>• Was a case-control design avoided?</li> <li>• Did the study avoid inappropriate exclusions?</li> </ul>                                            |
| Reference standard | <ul style="list-style-type: none"> <li>• Is the reference standard likely to correctly classify the target conditions?</li> <li>• Were the reference standard results interpreted without knowledge of the results of the index test?</li> </ul>                            |
| Index test         | <ul style="list-style-type: none"> <li>• Were the index test results interpreted without knowledge of the results of the reference standard?</li> <li>• Was the specimen processed as per the manufacturer's protocol of the particular index test?</li> </ul>              |
| Flow and timing    | <ul style="list-style-type: none"> <li>• Was there an appropriate interval between the index tests and reference standard?</li> <li>• Did all patients receive at least one identical reference standard?</li> <li>• Were all patients included in the analysis?</li> </ul> |

52

53

**Figure S4: Study-specific QUADAS-2 scores**

|                        | Patient selection | Index | Reference | Flow & timing | Overall |
|------------------------|-------------------|-------|-----------|---------------|---------|
| Almeida (2009)         | X                 | ?     | ?         | +             | -       |
| Altunoglu (2014)       | +                 | ?     | X         | +             | -       |
| Alzubaidi (2019)       | X                 | ?     | X         | +             | X       |
| Andrade (2013)         | X                 | ?     | ?         | ?             | -       |
| Anusiem (2016)         | ?                 | ?     | X         | ?             | -       |
| Atahan (2020)          | ?                 | ?     | ?         | +             | ?       |
| Barry (2018)           | +                 | ?     | ?         | +             | +       |
| Bloom (2012)           | ?                 | ?     | X         | X             | X       |
| Chedid (2020)          | ?                 | ?     | ?         | X             | -       |
| Chen (2011)            | ?                 | ?     | ?         | X             | -       |
| Choi (2016)            | X                 | ?     | ?         | ?             | -       |
| Chowdhury (2014)       | ?                 | ?     | X         | ?             | -       |
| Chung (2015)           | X                 | ?     | ?         | +             | -       |
| Chung (2016)           | +                 | ?     | ?         | +             | +       |
| Darboe (2019)          | X                 | X     | ?         | ?             | X       |
| Djoba Siawaya (2009)   | X                 | ?     | ?         | X             | X       |
| Drain (2015)           | X                 | ?     | ?         | X             | X       |
| Ehtesham (2011)        | ?                 | ?     | X         | +             | -       |
| Feng (2020)            | ?                 | ?     | ?         | X             | X       |
| Ferian (2017)          | X                 | ?     | ?         | +             | -       |
| Feruglio (2013)        | ?                 | ?     | ?         | +             | ?       |
| Francisco (2017)       | X                 | ?     | X         | ?             | X       |
| Garcia-Basteiro (2017) | X                 | +     | ?         | X             | X       |
| Gebremicael (2019a)    | ?                 | ?     | X         | ?             | -       |
| Gebremicael (2019b)    | X                 | X     | X         | ?             | X       |
| Hai (2019)             | X                 | ?     | ?         | +             | -       |
| Honeyborne (2015)      | X                 | ?     | ?         | +             | -       |
| Honeyborne (2014)      | ?                 | ?     | ?         | ?             | ?       |
| Honeyborne (2011)      | ?                 | ?     | ?         | +             | ?       |
| Hong (2013)            | ?                 | ?     | ?         | ?             | ?       |
| Ige (2016)             | X                 | ?     | X         | ?             | X       |
| Jayakumar (2015)       | +                 | +     | ?         | +             | +       |
| Jiang (2018)           | X                 | ?     | ?         | ?             | -       |
| Kabeer (2011)          | ?                 | X     | ?         | ?             | -       |
| Kawasaki (2019)        | X                 | +     | ?         | X             | X       |
| Khalil (2020)          | X                 | ?     | ?         | ?             | -       |
| Kim (2013)             | ?                 | ?     | ?         | ?             | ?       |
| Kim (2018)             | X                 | ?     | ?         | ?             | -       |
| Kumar (2017a)          | X                 | ?     | ?         | +             | -       |

**Judgement:**

- X High risk of bias
- Intermediate risk of bias
- + Low risk of bias
- ? Unclear risk of bias

|                       | Patient selection | Index | Reference | Flow & timing | Overall |
|-----------------------|-------------------|-------|-----------|---------------|---------|
| Kumar (2016)          | X                 | ?     | ?         | +             | -       |
| Kumar (2017b)         | X                 | ?     | ?         | +             | -       |
| Lee (2015)            | X                 | ?     | ?         | ?             | -       |
| Lee (2020)            | X                 | ?     | X         | ?             | X       |
| Luo (2018)            | X                 | ?     | X         | +             | X       |
| Matsushita (2015)     | X                 | ?     | X         | +             | X       |
| Mdivani (2009)        | ?                 | ?     | ?         | ?             | ?       |
| Mendy (2016)          | X                 | ?     | ?         | +             | -       |
| Mesquita (2016)       | X                 | ?     | ?         | ?             | -       |
| Miranda (2017)        | +                 | ?     | ?         | X             | -       |
| Montenegro (2014)     | ?                 | ?     | ?         | +             | ?       |
| Moraes (2014)         | X                 | ?     | ?         | X             | X       |
| Mvungi (2019)         | X                 | ?     | X         | ?             | X       |
| Nie (2020)            | ?                 | ?     | ?         | +             | ?       |
| Osawa (2020)          | ?                 | ?     | X         | +             | -       |
| Penn-Nicholson (2020) | X                 | ?     | ?         | +             | -       |
| Rabna (2012)          | X                 | ?     | X         | ?             | X       |
| Ralph (2013)          | X                 | +     | ?         | X             | X       |
| Raras (2010)          | ?                 | ?     | X         | +             | -       |
| Riou (2012)           | ?                 | ?     | ?         | +             | ?       |
| Rockwood (2017)       | ?                 | X     | X         | ?             | X       |
| Ronacher (2019)       | X                 | ?     | ?         | +             | -       |
| Sabitti (2020)        | ?                 | ?     | ?         | ?             | ?       |
| Sahin (2012)          | X                 | ?     | ?         | ?             | -       |
| Said (2013)           | X                 | X     | X         | +             | X       |
| Siawaya (2008a)       | X                 | +     | ?         | +             | -       |
| Siawaya (2008b)       | X                 | ?     | ?         | +             | -       |
| Sigal (2017)          | X                 | +     | ?         | +             | -       |
| Singh (2012)          | ?                 | ?     | ?         | ?             | ?       |
| Sivakumaran (2020)    | ?                 | ?     | ?         | ?             | ?       |
| Ugarte-Gil (2013)     | ?                 | ?     | ?         | +             | ?       |
| Wang (2016)           | X                 | ?     | ?         | +             | -       |
| Warsinske (2018)      | +                 | ?     | ?         | ?             | ?       |
| Wood (2012)           | +                 | ?     | X         | X             | X       |
| Yan (2018)            | ?                 | +     | ?         | ?             | ?       |
| Zetola (2016)         | X                 | ?     | ?         | +             | -       |
| Zhao (2019)           | X                 | ?     | X         | ?             | X       |
| Zhu (2015)            | X                 | ?     | X         | +             | X       |

**Judgement:**

-  High risk of bias
-  Intermediate risk of bias
-  Low risk of bias
-  Unclear risk of bias

58 **Table S5: Complete list of studies and biomarkers included in qualitative analysis**

59

| Biomarker                 | Author (year)     | Assay name                                                                                                             | Ref  | County                       | Follow ups                                           | Sample used (state) | Reference used                                                             |
|---------------------------|-------------------|------------------------------------------------------------------------------------------------------------------------|------|------------------------------|------------------------------------------------------|---------------------|----------------------------------------------------------------------------|
| 16S rRNA                  | Hai (2019)        | RT-qPCR for 16 S rRNA MBLA on the LightCycler Multiplex RNA Virus Master (Roche)                                       | (1)  | Vietnam                      | 0, W1, W2, W4                                        | Sputum (frozen)     | Liquid culture (MGIT)<br>Smear microscopy (ZN)<br>GeneXpert (NR)           |
|                           | Honeyborne (2011) | RT-qPCR for 16S rRNA MBLA on the Rotor-Gene Q 5-plex HRM platform (Qiagen)                                             | (2)  | South Africa                 | 0, D3, D7, D14, D56                                  | Sputum (frozen)     | Liquid culture (7H9)                                                       |
|                           | Honeyborne (2014) | 16S rRNA MBLA                                                                                                          | (3)  | Tanzania                     | 0, D2, D4, D5, D7, D10, D14                          | Sputum (NR)         | Solid culture (7H11)<br>Liquid culture (MGIT 960)                          |
|                           | Sabiiti (2020)    | RT-qPCR for 16s rRNA MBLA                                                                                              | (4)  | Tanzania, Mozambique, Malawi | 0, W1, W2, W3, W4, W5, W6, W7, W8, W9, W10, W11, W12 | Sputum (NR)         | Solid culture (LJ)<br>Liquid culture (MGIT)                                |
|                           | Yan (2018)        | Simultaneous amplification and testing for TB (SAT-TB) for 16S rRNA using AmpSure assay (Shanghai Rendu Biotechnology) | (5)  | China                        | 0, W2, M2, M5, M6-8                                  | Sputum (NR)         | Liquid culture (MGIT 960)<br>Smear microscopy (FM)<br>CT scan              |
| 85B mRNA                  | Atahan (2020)     | RT-qPCR for 85B mRNA on the LightCycler 480 II Real-Time PCR System (Roche)                                            | (6)  | Turkey                       | 0, D15, D30                                          | Sputum (frozen)     | Solid culture (LJ)<br>Liquid culture (MGIT 960)<br>Microscopy (NR)         |
|                           | Montenegro (2014) | RT-qPCR for 85B mRNA on the ABI PRISM 7500 thermal cycler (Applied Biosystems)                                         | (7)  | Brazil                       | 0, D15, D30                                          | Sputum (fresh)      | Solid culture (LJ)                                                         |
|                           | Mdivani (2009)    | RT-PCR for 85B mRNA on the ABI PRISM 7700 Sequence Detection System (Applied Biosystems)                               | (8)  | Georgia                      | 0, W2, M1, M2, M4                                    | Sputum (fresh)      | Solid culture (LJ)                                                         |
|                           | Singh (2012)      | qRT-PCR for 85B mRNA on the ABI Prism 7000 Sequence Detector System (Perkin Elmer Corp. / Applied Biosystems)          | (9)  | India                        | 0, D30, D60                                          | NR (NR)             | Solid culture (LJ)<br>Liquid culture (BACTEC 460)<br>Smear microscopy (NR) |
| Adenosine deaminase (ADA) | Altunoglu (2014)  | Serum ADA-colorimetric assay (Diazyme General Atomics)                                                                 | (10) | Turkey                       | 0, M2                                                | Serum (frozen)      | Smear microscopy (NR)                                                      |
|                           | Ige (2016)        | ADA ELISA kit (Elabscience)                                                                                            | (11) | Nigeria                      | 0, M6                                                | Plasma (NR)         | Smear microscopy (NR)                                                      |



|                             |                      |                                                                                                       |      |              |                          |                 |                                                                               |
|-----------------------------|----------------------|-------------------------------------------------------------------------------------------------------|------|--------------|--------------------------|-----------------|-------------------------------------------------------------------------------|
| Albumin                     | De Moraes (2014)     | Albumin Advia colorimetric quantification (Siemens Healthcare Diagnostics)                            | (12) | Brazil       | 0, D30, D60              | Serum (fresh)   | Solid culture (LJ)<br>Clinical outcome<br>Smear microscopy (ZN)               |
| Angiotensinogen             | Jiang (2018)         | Angiotensinogen ELISA kit (RayBiotech)                                                                | (13) | China        | 0, M2                    | Serum (NR)      | Culture (NR)<br>Smear microscopy (NR)                                         |
| Angiopoietins (Ang)         | Kumar (2017)         | Ang-1 and Ang-2 Quantikine ELISA KIT (R&D Systems)                                                    | (14) | India        | 0, M6                    | Plasma (frozen) | Solid culture (LJ)                                                            |
| Apolipoprotein              | Jiang (2018)         | Apolipoprotein C-II ELISA kit (RayBiotech)                                                            | (13) | China        | 0, M2                    | Serum (NR)      | Culture (NR)<br>Smear microscopy (NR)                                         |
|                             | Jiang (2018)         | Apolipoprotein A-IV ELISA kit (CUSABIO Biotech)                                                       | (13) | China        | 0, M2                    | Serum (NR)      | Culture (NR)<br>Smear microscopy (NR)                                         |
| Beta-2 microglobulin (B2M)  | Mendy (2016)         | B2M ELISA kit (Immunology Consultants Laboratory)                                                     | (15) | Gambia       | 0, M2, M6                | Plasma (frozen) | Liquid culture (MGIT)<br>Smear microscopy (ZN)<br>Chest X-ray                 |
| Cancer antigen 125 (CA-125) | Kim (2013)           | CA-125 radio-immunoassay kit (Cis Bio International)                                                  | (16) | South Korea  | 0, M6                    | Serum (NR)      | Culture (NR)<br>Smear microscopy (NR)<br>Chest X-ray                          |
|                             | Sahin (2012)         | CA-125 microparticle enzyme immunoassay method (Abbott-AxSYM System)                                  | (17) | Turkey       | 0, M2                    | Serum (NR)      | Solid culture (LJ)<br>Smear microscopy (ZN)<br>Chest X-ray                    |
|                             | Said (2013)          | VIDAS CA-125 II (Biomérieux)                                                                          | (18) | Egypt        | 0, M4                    | Serum (frozen)  | Smear microscopy (ZN)                                                         |
| Complement C7               | Jiang (2018)         | Complement component C7 ELISA kit (Abcam)                                                             | (13) | China        | 0, M2                    | Serum (NR)      | Culture (NR)<br>Smear microscopy (NR)                                         |
| Cough frequency             | Lee (2020)           | CayCaMo cough monitor                                                                                 | (19) | Peru         | 0, D3, D7, D14, D30, D60 | Cough (fresh)   | Smear microscopy (NR)<br>Microscopic-observation drug susceptibility (MODS)   |
| C-reactive protein (CRP)    | Almeida (2009)       | Roche CRPLX kit on the Roche Modular Analyser (Roche)                                                 | (20) | Brazil       | 0, W1, W3, W5, W8        | Plasma (frozen) | Solid culture (NR)<br>Clinical outcome<br>Smear microscopy (NR)               |
|                             | Djoba Siawaya (2008) | CRP ELISA kit (Bender MedSystems)                                                                     | (21) | South Africa | 0, W1, W5, W13, W26      | Serum (frozen)  | Chest X-ray<br>Liquid culture (BACTEC)                                        |
|                             | Ferrian (2017)       | CRP on a multiplex (ProcartaPlex Human kits, eBioscience) read on a luminometer (Bioplex 200, BioRad) | (22) | South Africa | 0, M2, M4, M6            | Plasma (frozen) | Smear microscopy (NR)<br>Liquid culture (MGIT 960)<br>Line probe assay (Hain) |

|        |                  |                                                                          |      |                                            |                        |                                               |                                                                                        |
|--------|------------------|--------------------------------------------------------------------------|------|--------------------------------------------|------------------------|-----------------------------------------------|----------------------------------------------------------------------------------------|
|        | Francisco (2017) | Quantikine ELISA (R&D Systems Inc., Minneapolis, MN, USA)                | (23) | China                                      | 0, M4, M6, M7          | Whole blood (NR)                              | Clinical outcome                                                                       |
|        | Jayakumar (2015) | CRP iCHROMA Point-of-care Reader (BodiTech Med Inc)                      | (24) | Uganda                                     | 0, W8, W20             | Serum (frozen)                                | Solid culture (NR)<br>Liquid culture (MGIT 960)                                        |
|        | Khalil (2020)    | CRP Nycocard Reader II (Abbott)                                          | (25) | Egypt                                      | M1, M2, M3             | Whole blood (NR)<br>Plasma (NR)<br>Serum (NR) | Solid culture (LJ)<br>Clinical outcome<br>Smear microscopy (ZN)<br>GeneXpert (MTB/RIF) |
|        | Mendy (2016)     | CRP ELISA kit (Immunology Consultants Laboratory)                        | (15) | Gambia                                     | 0, M2, M6              | Plasma (frozen)                               | Liquid culture (MGIT)<br>Smear microscopy (ZN)<br>Chest X-ray                          |
|        | Mesquita (2016)  | CRP ELISA kit (Ebioscience)                                              | (26) | Brazil                                     | 0, D60                 | Serum (frozen)                                | Culture (NR)<br>Chest X-ray                                                            |
|        | Miranda (2017)   | CRP ELISA kit (Ebioscience)                                              | (27) | Brazil                                     | 0, D30, D60            | Serum (frozen)                                | Solid culture (LJ)                                                                     |
|        | De Moraes (2014) | CRP BNII nephelometer (Dade Behring)                                     | (12) | Brazil                                     | 0, D30, D60            | Serum (fresh)                                 | Solid culture (LJ)<br>Clinical outcome<br>Smear microscopy (ZN)                        |
|        | Sigal (2017)     | CRP – V-PLEX Human Vascular Injury Panel 2 (Meso Scale Diagnostics)      | (28) | North America, Spain, South Africa, Uganda | 0, W8, W12             | Serum (frozen)                                | Solid culture (LJ)<br>Liquid culture (MGIT 960)<br>Clinical outcome<br>Chest X-ray     |
| CXCL9  | Chung (2015)     | CXCL9 ELISA kit (R&D Systems)                                            | (29) | South Korea                                | 0, M1, M2, M3, M6, M12 | Serum (frozen)                                | Culture (NR)<br>Smear microscopy (NR)<br>Clinical outcome<br>Chest X-ray               |
|        | Chung (2016)     | CXCL9 ELISA kit (R&D Systems)                                            | (30) | South Korea                                | 0, M2                  | Serum (frozen)                                | Culture (NR)<br>Smear microscopy (NR)<br>Clinical outcome<br>Chest X-ray               |
|        | Lee (2015)       | CXCL9 – Bioplex Multiplex Suspension Array System (Bio-Rad Laboratories) | (31) | Taiwan                                     | 0, M2                  | Plasma (NR)<br>Culture supernatant (NR)       | Culture (NR)                                                                           |
| CXCL11 | Chung (2015)     | CXCL11 ELISA kit (R&D Systems)                                           | (29) | South Korea                                | 0, M1, M2, M3, M6, M12 | Serum (frozen)                                | Culture (NR)<br>Smear microscopy (NR)<br>Clinical outcome<br>Chest X-ray               |

|                                                                            |                      |                                                                                          |      |              |                                   |                 |                                                                          |
|----------------------------------------------------------------------------|----------------------|------------------------------------------------------------------------------------------|------|--------------|-----------------------------------|-----------------|--------------------------------------------------------------------------|
|                                                                            | Chung (2016)         | CXCL11 ELISA kit (R&D Systems)                                                           | (30) | South Korea  | 0, M2                             | Serum (frozen)  | Culture (NR)<br>Smear microscopy (NR)<br>Clinical outcome<br>Chest X-ray |
| Endothelin-1 (ET-1)                                                        | Wang (2016)          | ET-1 ELISA kit (R&D Systems)                                                             | (32) | China        | 0, D1, D2, D4, D6, D10, D14       | Sputum (fresh)  | Solid culture (7H11)<br>Liquid culture (MGIT 960)                        |
| Eotaxin                                                                    | Choi (2016)          | Eotaxin – Millipore Human Cytokine/ Chemokine Magnetic Bead Panel (HCYTOMAG-60 K-02)     | (33) | South Korea  | 0, M2, M6                         | Serum (fresh)   | Solid culture (NR)<br>Liquid culture (NR)<br>Smear microscopy (NR)       |
|                                                                            | Choi (2016)          | CCL11/Eotaxin Quantikine ELISA kit (R&D Systems Inc)                                     | (33) | South Korea  | 0, M2, M6                         | Serum (fresh)   | Solid culture (NR)<br>Liquid culture (NR)<br>Smear microscopy (NR)       |
|                                                                            | Djoba Siawaya (2009) | Eotaxin – Lincoplex human cytokine 29-plex assays (Millipore)                            | (34) | South Africa | 0, W1, W5, W13, W26               | Plasma (frozen) | Liquid culture (BACTEC 460T)<br>Smear microscopy (NR)                    |
|                                                                            | Riou (2012)          | Exotaxin – Multiplex bead array (Bulletin# 10014905 Bio-Rad) on a luminometer (Luminex)  | (35) | South Africa | 0, W2, W4, W8, W12, W26, W52, W78 | Plasma (frozen) | Solid culture (LJ)<br>Liquid culture (MGIT)<br>Smear microscopy (FM)     |
| Epidermal growth factor (EGF)                                              | Djoba Siawaya (2009) | EGF – Lincoplex human cytokine 29-plex assays (Millipore)                                | (34) | South Africa | 0, W1, W5, W13, W26               | Plasma (frozen) | Liquid culture (BACTEC 460T)<br>Smear microscopy (NR)                    |
| Fractional exhaled nitric oxide (FeNO) & volatile organic compounds (VOCs) | Ralph (2013)         | FeNO – Portable NiOX MINO device (Aerocrine, Sweden)                                     | (36) | Indonesia    | 0, W1, W2, M1, M2, M6             | Breath (fresh)  | Liquid culture (MGIT)<br>Smear microscopy (NR)<br>Chest X-ray            |
|                                                                            | Zetola (2016)        | VOC – quartz microbalance (QMB) gas sensors                                              | (37) | Botswana     | 0, D2, D7, D14, D30               | Breath (fresh)  | Liquid culture (MGIT)                                                    |
| Fibroblast growth factor (FGF) basic                                       | Riou (2012)          | FGF basic – Multiplex bead array (Bulletin# 10014905 Bio-Rad) on a luminometer (Luminex) | (35) | South Africa | 0, W2, W4, W8, W12, W26, W52, W78 | Plasma (frozen) | Solid culture (LJ)<br>Liquid culture (MGIT)<br>Smear microscopy (FM)     |
| Ferritin                                                                   | Miranda (2017)       | Ferritin ELISA kit (Abnova)                                                              | (27) | Brazil       | 0, D30, D60                       | Serum (frozen)  | Solid culture (LJ)                                                       |
| Globulin                                                                   | De Moraes (2014)     | Globulin Advia colorimetric quantification (Siemens Healthcare Diagnostics)              | (12) | Brazil       | 0, D30, D60                       | Serum (fresh)   | Solid culture (LJ)<br>Clinical outcome<br>Smear microscopy (ZN)          |
| Granulocyte colony stimulating factor (G-CSF)                              | Riou (2012)          | G-CSF – Multiplex bead array (Bulletin# 10014905 Bio-Rad) on a luminometer (Luminex)     | (35) | South Africa | 0, W2, W4, W8, W12, W26, W52, W78 | Plasma (frozen) | Solid culture (LJ)<br>Liquid culture (MGIT)<br>Smear microscopy (FM)     |

|                                                           |                      |                                                                                        |      |              |                                   |                                         |                                                                                     |
|-----------------------------------------------------------|----------------------|----------------------------------------------------------------------------------------|------|--------------|-----------------------------------|-----------------------------------------|-------------------------------------------------------------------------------------|
| Granulocyte macrophage colony stimulating factor (GM-CSF) | Riou (2012)          | GM-CSF – Multiplex bead array (Bulletin# 10014905 Bio-Rad) on a luminometer (Luminex)) | (35) | South Africa | 0, W2, W4, W8, W12, W26, W52, W78 | Plasma (frozen)                         | Solid culture (LJ)<br>Liquid culture (MGIT)<br>Smear microscopy (FM)                |
| Granzyme (A and B)                                        | Djoba Siawaya (2008) | Granzyme B ELISA (Bender MedSystems)                                                   | (21) | South Africa | 0, W1, W5, W13, W26               | Serum (frozen)                          | Chest X-ray<br>Liquid culture (BACTEC)                                              |
|                                                           | Jayakumar (2015)     | Granzyme B ELISA kit (Bender MedSystems)                                               | (24) | Uganda       | 0, W8, W20                        | Serum (frozen)                          | Solid culture (NR)<br>Liquid culture (MGIT 960)                                     |
|                                                           | Lee (2015)           | Granzyme A – Bioplex Multiplex Suspension Array System (Bio-Rad Laboratories)          | (31) | Taiwan       | 0, M2                             | Plasma (NR)<br>Culture supernatant (NR) | Culture (NR)                                                                        |
| Heme oxygenase-1 (HO-1)                                   | Andrade (2013)       | HO-1 ELISA kit (Assay Designs)                                                         | (38) | India        | W0, W26                           | Plasma (NR)                             | Culture (NR)                                                                        |
|                                                           | Rockwood (2017)      | HO-1 ELISA kit (ADI-EKS-800, Enzo Life Sciences)                                       | (39) | South Africa | 0, W8, W20                        | Plasma (frozen)                         | Culture (NR)<br>Chest X-ray                                                         |
| Hemoglobin                                                | De Moraes (2014)     | Hemoglobin ABX Pentra DF 120 (Horiba Diagnostics)                                      | (12) | Brazil       | 0, D30, D60                       | Serum (fresh)                           | Solid culture (LJ)<br>Clinical outcome<br>Smear microscopy (ZN)                     |
| High-sensitivity CRP (hs-CRP)                             | Altunoglu (2014)     | hs-CRP BN II nephelometer (Dade Behring)                                               | (10) | Turkey       | 0, M2                             | Serum (frozen)                          | Smear microscopy (NR)                                                               |
|                                                           | Chen (2011)          | hs-CRP nephelometry (Dade Behring BM2)                                                 | (40) | Taiwan       | 0, M2, M6                         | Serum (NR)                              | Solid culture (LJ)<br>Liquid culture (MGIT)<br>Smear microscopy (ZN)<br>Chest X-ray |
|                                                           | Ehtesham (2011)      | hs-CRP ELISA kit (Diagnostic Biochem Canada Inc.)                                      | (41) | India        | 0, M2, M4, M6                     | Serum (frozen)                          | Clinical outcome<br>Smear microscopy (NR)                                           |
| IFN- $\gamma$                                             | Chowdhury (2014)     | IFN- $\gamma$ high sensitivity human ELISA kit (ImmunoTools)                           | (42) | India        | 0, M2, M4, M6                     | Serum (NR)                              | Smear microscopy (ZN)<br>Chest X-ray                                                |
|                                                           | Chung (2015)         | IFN- $\gamma$ ELISA kit (R&D Systems)                                                  | (29) | South Korea  | 0, M1, M2, M3, M6, M12            | Serum (frozen)                          | Culture (NR)<br>Smear microscopy (NR)<br>Clinical outcome<br>Chest X-ray            |
|                                                           | Djoba Siawaya (2008) | IFN- $\gamma$ – Bio-Plex bead array system (Bio-Rad Laboratories)                      | (43) | South Africa | 0, D3, W1, W2, W4, W8, W13, W26   | Peripheral blood (frozen)               | Smear microscopy (ZN)<br>Liquid culture (BACTEC 460TB)                              |
|                                                           | Nie (2020)           | IFN- $\gamma$ ELISA kit (BioLegend)                                                    | (44) | China        | 0, M1-2, M6                       | Serum (frozen)                          | Culture (NR)<br>Smear microscopy (NR)<br>CT scan                                    |

|                          |                    |                                                                                                             |      |                                            |                                   |                                                         |                                                                                    |
|--------------------------|--------------------|-------------------------------------------------------------------------------------------------------------|------|--------------------------------------------|-----------------------------------|---------------------------------------------------------|------------------------------------------------------------------------------------|
|                          | Matsushita (2015)  | IFN- $\gamma$ – 27-plex assay on the Bio-Plex Suspension Array System (Bio-Rad)                             | (45) | Vietnam                                    | 0, M2, M7                         | Plasma (frozen)                                         | Smear microscopy (NR)<br>Chest X-ray                                               |
|                          | Mvungi (2019)      | IFN- $\gamma$ – multiplex assay (Human Premixed Multi-Analyte Kit; cat. # LXSAHM) on the Luminex 200 system | (46) | Tanzania                                   | 0, M2                             | Plasma (frozen) prepared using QuantiFERON-TB Gold Plus | Clinical outcome                                                                   |
|                          | Riou (2012)        | IFN- $\gamma$ – Multiplex bead array (Bulletin# 10014905 Bio-Rad) on a luminometer (Luminex)                | (35) | South Africa                               | 0, W2, W4, W8, W12, W26, W52, W78 | Plasma (frozen)                                         | Solid culture (LJ)<br>Liquid culture (MGIT)<br>Smear microscopy (FM)               |
|                          | Sigal (2017)       | IFN- $\gamma$ – V-PLEX Human Pro-inflammatory Panel 1 (Meso Scale Diagnostics)                              | (28) | North America, Spain, South Africa, Uganda | 0, W8, W12                        | Serum (frozen)                                          | Solid culture (LJ)<br>Liquid culture (MGIT 960)<br>Clinical outcome<br>Chest X-ray |
| Iron                     | Gebremicael (2019) | Iron on c501 module of cobas6000 analyser (Roche Diagnostics)                                               | (47) | Ethiopia                                   | 0, M6                             | Serum (frozen)                                          | Clinical outcome<br>Smear microscopy (ZN)                                          |
| IS6110 insertion element | Mdivani (2009)     | RT-DNA for IS6110 insertion using ABI PRISM 7700 Sequence Detection System (Applied Biosystems)             | (8)  | Georgia                                    | 0, W2, M1, M2, M4                 | Sputum (fresh)                                          | Solid culture (LJ)                                                                 |
| IL-1 $\beta$             | Anusiem (2016)     | Interleukin-1 $\beta$ ELISA kit (eBioscience)                                                               | (48) | Nigeria                                    | W0, W8, W26                       | Serum (frozen)                                          | Smear microscopy (NR)                                                              |
|                          | Chowdhury (2014)   | Human IL-1 $\beta$ ELISA kit (Raybiotech)                                                                   | (42) | India                                      | 0, M2, M4, M6                     | Serum (NR)                                              | Smear microscopy (ZN)<br>Chest X-ray                                               |
|                          | Luo (2018)         | IL-1 $\beta$ ELISA kits (Siemens Healthcare Diagnostics)                                                    | (49) | China                                      | 0, M2                             | Serum (fresh)                                           | Smear microscopy (FM)                                                              |
|                          | Riou (2012)        | IL-1 $\beta$ – Multiplex bead array (Bulletin# 10014905 Bio-Rad) on a luminometer (Luminex)                 | (35) | South Africa                               | 0, W2, W4, W8, W12, W26, W52, W78 | Plasma (frozen)                                         | Solid culture (LJ)<br>Liquid culture (MGIT)<br>Smear microscopy (FM)               |
| IL-1RA                   | Matsushita (2015)  | IL-1RA – 27-plex assay on the Bio-Plex Suspension Array System (Bio-Rad)                                    | (45) | Vietnam                                    | 0, M2, M7                         | Plasma (frozen)                                         | Smear microscopy (NR)<br>Chest X-ray                                               |
|                          | Riou (2012)        | IL-1RA – Multiplex bead array (Bulletin# 10014905 Bio-Rad) on a luminometer (Luminex)                       | (35) | South Africa                               | 0, W2, W4, W8, W12, W26, W52, W78 | Plasma (frozen)                                         | Solid culture (LJ)<br>Liquid culture (MGIT)<br>Smear microscopy (FM)               |

|      |                      |                                                                                                  |      |              |                                   |                                             |                                                                      |
|------|----------------------|--------------------------------------------------------------------------------------------------|------|--------------|-----------------------------------|---------------------------------------------|----------------------------------------------------------------------|
| IL-2 | Alzubaidi (2019)     | IL-2 ELISA kit (R&D Systems)                                                                     | (50) | Iraq         | W0, D2, D4, W1, W2, W3, W4, W9    | Sputum (fresh)                              | Smear microscopy (NR)                                                |
|      | Kumar (2017)         | IL-2 Quantikine ELISA kit (R&D Systems)                                                          | 47   | India        | 0, M6                             | Plasma (fresh)                              | Culture (NR)                                                         |
|      | Matsushita (2015)    | IL-2 – 27-plex assay on the Bio-Plex Suspension Array System (Bio-Rad)                           | (45) | Vietnam      | 0, M2, M7                         | Plasma (frozen)                             | Smear microscopy (NR)<br>Chest X-ray                                 |
|      | Riou (2012)          | IL-2 – Multiplex bead array (Bulletin# 10014905 Bio-Rad) on a luminometer (Luminex)              | (35) | South Africa | 0, W2, W4, W8, W12, W26, W52, W78 | Plasma (frozen)                             | Solid culture (LJ)<br>Liquid culture (MGIT)<br>Smear microscopy (FM) |
| IL-4 | Chowdhury (2014)     | IL-4 high sensitivity human ELISA kit (ImmunoTools)                                              | (42) | India        | 0, M2, M4, M6                     | Serum (NR)                                  | Smear microscopy (ZN)<br>Chest X-ray                                 |
|      | Djoba Siawaya (2008) | IL4 – Bio-Plex bead array system (Bio-Rad Laboratories)                                          | (43) | South Africa | 0, D3, W1, W2, W4, W8, W13, W26   | Peripheral blood (frozen)                   | Smear microscopy (ZN)<br>Liquid culture (BACTEC 460TB)               |
|      | Mvungi (2019)        | IL-4 multiplex assay (Human Premixed Multi-Analyte Kit; cat. # LXSAHM) on the Luminex 200 system | (46) | Tanzania     | 0, M2                             | Plasma (frozen)                             | Clinical outcome                                                     |
|      | Nie (2020)           | IL-4 ELISA kit (BioLegend, USA)                                                                  | (44) | China        | 0, M1-2, M6                       | Serum (frozen)                              | Culture (NR)<br>Smear microscopy (NR)<br>Chest computed tomography   |
|      | Riou (2012)          | IL-4 – Multiplex bead array (Bulletin# 10014905 Bio-Rad) on a luminometer (Luminex)              | (35) | South Africa | 0, W2, W4, W8, W12, W26, W52, W78 | Plasma (frozen)                             | Solid culture (LJ)<br>Liquid culture (MGIT)<br>Smear microscopy (FM) |
| IL-5 | Riou (2012)          | IL-5 – Multiplex bead array (Bulletin# 10014905 Bio-Rad) on a luminometer (Luminex)              | (35) | South Africa | 0, W2, W4, W8, W12, W26, W52, W78 | Plasma (frozen)                             | Solid culture (LJ)<br>Liquid culture (MGIT)<br>Smear microscopy (FM) |
| IL-6 | Chowdhury (2014)     | IL-6 ELISA kit (Raybiotech)                                                                      | (42) | India        | 0, M2, M4, M6                     | Serum (NR)                                  | Smear microscopy (ZN)<br>Chest X-ray                                 |
|      | Djoba Siawaya (2009) | IL-6 – Lincoplex human cytokine 29-plex assays (Millipore)                                       | (34) | South Africa | 0, W1, W5, W13, W26               | Plasma (frozen)                             | Liquid culture (BACTEC 460T)<br>Smear microscopy (NR)                |
|      | Feng (2020)          | IL-6 Quantikine ELISA kit (R&D Systems)                                                          | (51) | Taiwan       | 0, W8                             | Peripheral blood mononuclear cells (frozen) | Culture (NR)<br>Smear microscopy (NR)                                |

|                |                      |                                                                                                     |      |                                            |                                   |                                                         |                                                                                    |
|----------------|----------------------|-----------------------------------------------------------------------------------------------------|------|--------------------------------------------|-----------------------------------|---------------------------------------------------------|------------------------------------------------------------------------------------|
|                | Luo (2018)           | IL-6 ELISA kits (Siemens Healthcare Diagnostics Products Ltd., Llanberis, Gwynedd, UK)              | (49) | China                                      | 0, M2                             | Serum (fresh)                                           | Smear microscopy (FM)                                                              |
|                | Mvungi (2019)        | IL-6 multiplex assay (Human Premixed Multi-Analyte Kit; cat. # LXSAHM) on the Luminex 200 system    | (46) | Tanzania                                   | 0, M2                             | Plasma (frozen) prepared using QuantiFERON-TB Gold Plus | Clinical outcome                                                                   |
|                | Riou (2012)          | IL-6 – Multiplex bead array (Bulletin# 10014905 Bio-Rad) on a luminometer (Luminex)                 | (35) | South Africa                               | 0, W2, W4, W8, W12, W26, W52, W78 | Plasma (frozen)                                         | Solid culture (LJ)<br>Liquid culture (MGIT)<br>Smear microscopy (FM)               |
|                | Sigal (2017)         | IL-6 – V-PLEX Human Pro-inflammatory Panel 1 (Meso Scale Diagnostics)                               | (28) | North America, Spain, South Africa, Uganda | 0, W8, W12                        | Serum (frozen)                                          | Solid culture (LJ)<br>Liquid culture (MGIT 960)<br>Clinical outcome<br>Chest X-ray |
| IL-7           | Kumar (2017)         | IL-7 Quantikine ELISA kit (R&D Systems)                                                             | (52) | India                                      | 0, M6                             | Plasma (fresh)                                          | Culture (NR)                                                                       |
|                | Riou (2012)          | IL-7 – Multiplex bead array (Bulletin# 10014905 Bio-Rad) on a luminometer (Luminex)                 | (35) | South Africa                               | 0, W2, W4, W8, W12, W26, W52, W78 | Plasma (frozen)                                         | Solid culture (LJ)<br>Liquid culture (MGIT)<br>Smear microscopy (FM)               |
| IL-9           | Riou (2012)          | IL-9 – Multiplex bead array (Bulletin# 10014905 Bio-Rad) on a luminometer (Luminex)                 | (35) | South Africa                               | 0, W2, W4, W8, W12, W26, W52, W78 | Plasma (frozen)                                         | Solid culture (LJ)<br>Liquid culture (MGIT)<br>Smear microscopy (FM)               |
| IL-10, IL-10Ra | Chowdhury (2014)     | IL-10 high sensitivity human ELISA set (ImmunoTools)                                                | (42) | India                                      | 0, M2, M4, M6                     | Serum (NR)                                              | Smear microscopy (ZN)<br>Chest X-ray                                               |
|                | Djoba Siawaya (2009) | IL-10 – Lincoplex human cytokine 29-plex assays (Millipore)                                         | (34) | South Africa                               | 0, W1, W5, W13, W26               | Plasma (frozen)                                         | Liquid culture (BACTEC 460T)<br>Smear microscopy (NR)                              |
|                | Mvungi (2019)        | IL-10 – multiplex assay (Human Premixed Multi-Analyte Kit; cat. # LXSAHM) on the Luminex 200 system | (46) | Tanzania                                   | 0, M2                             | Plasma (frozen) prepared using QuantiFERON-TB Gold Plus | Clinical outcome                                                                   |
|                | Riou (2012)          | IL-10 – Multiplex bead array (Bulletin# 10014905 Bio-Rad) on a luminometer (Luminex)                | (35) | South Africa                               | 0, W2, W4, W8, W12, W26, W52, W78 | Plasma (frozen)                                         | Solid culture (LJ)<br>Liquid culture (MGIT)<br>Smear microscopy (FM)               |
|                | Zhao (2019)          | IL-10Ra ELISA kit (accession #: Q13651; RayBiotech)                                                 | (53) | China                                      | 0, W1, W2, W3, W4, W5, W6, W7, W8 | Peripheral blood mononuclear cells (fresh)              | Smear microscopy (NR)                                                              |

|                               |                      |                                                                                         |      |              |                                   |                                         |                                                                                     |
|-------------------------------|----------------------|-----------------------------------------------------------------------------------------|------|--------------|-----------------------------------|-----------------------------------------|-------------------------------------------------------------------------------------|
| IL-12, IL-12p40,<br>IL-12p700 | Djoba Siawaya (2009) | IL-12p40 – Lincoplex human cytokine 29-plex assays (Millipore)                          | (34) | South Africa | 0, W1, W5, W13, W26               | Plasma (frozen)                         | Liquid culture (BACTEC 460T)<br>Smear microscopy (NR)                               |
|                               | Chowdhury (2014)     | IL-12p40 ELISA Kit (RayBiotech)                                                         | (42) | India        | 0, M2, M4, M6                     | Serum (NR)                              | Smear microscopy (ZN)<br>Chest X-ray                                                |
|                               | Riou (2012)          | IL-12p70 – Multiplex bead array (Bulletin# 10014905 Bio-Rad) on a luminometer (Luminex) | (35) | South Africa | 0, W2, W4, W8, W12, W26, W52, W78 | Plasma (frozen)                         | Solid culture (LJ)<br>Liquid culture (MGIT)<br>Smear microscopy (FM)                |
|                               | Zhu (2015)           | IL-12 – ELISA kit (eBioscience)                                                         | (54) | China        | 0, W2-8                           | Plasma (frozen)                         | Smear microscopy (NR)                                                               |
| IL-13                         | Djoba Siawaya (2009) | IL-13 – Lincoplex human cytokine 29-plex assays (Millipore)                             | (34) | South Africa | 0, W1, W5, W13, W26               | Plasma (frozen)                         | Liquid culture (BACTEC 460T)                                                        |
|                               | Riou (2012)          | IL-13 – Multiplex bead array (Bulletin# 10014905 Bio-Rad) on a luminometer (Luminex)    | (35) | South Africa | 0, W2, W4, W8, W12, W26, W52, W78 | Plasma (frozen)                         | Solid culture (LJ)<br>Liquid culture (MGIT)<br>Smear microscopy (FM)                |
| IL-15                         | Djoba Siawaya (2009) | IL-15 – Lincoplex human cytokine 29-plex assays (Millipore)                             | (34) | South Africa | 0, W1, W5, W13, W26               | Plasma (frozen)                         | Liquid culture (BACTEC 460T)<br>Smear microscopy (NR)                               |
|                               | Kumar (2017)         | IL-15 Quantikine ELISA kit (R&D Systems)                                                | (52) | India        | 0, M6                             | Plasma (fresh)                          | Culture (NR)                                                                        |
|                               | Riou (2012)          | IL-15 – Multiplex bead array (Bulletin# 10014905 Bio-Rad) on a luminometer (Luminex)    | (35) | South Africa | 0, W2, W4, W8, W12, W26, W52, W78 | Plasma (frozen)                         | Solid culture (LJ)<br>Liquid culture (MGIT)<br>Smear microscopy (FM)                |
| IL-17                         | Chen (2011)          | IL-17 ELISA (R&D Systems)                                                               | (40) | Taiwan       | 0, M2, M6                         | Serum (NR)                              | Solid culture (LJ)<br>Liquid culture (MGIT)<br>Smear microscopy (ZN)<br>Chest X-ray |
|                               | Riou (2012)          | IL-17 – Multiplex bead array (Bulletin# 10014905 Bio-Rad) on a luminometer (Luminex)    | (35) | South Africa | 0, W2, W4, W8, W12, W26, W52, W78 | Plasma (frozen)                         | Solid culture (LJ)<br>Liquid culture (MGIT)<br>Smear microscopy (FM)                |
| IL-17A                        | Feng (2020)          | IL-17A – 7-Plex Human ProcartaPlex Panel (Affymetrix eBioscience)                       | (51) | Taiwan       | 0, W8                             | Peripheral blood (frozen)               | Culture (NR)<br>Smear microscopy (NR)                                               |
| IL-18                         | Lee (2015)           | IL-18 – Bioplex Multiplex Suspension Array System (Bio-Rad Laboratories)                | (31) | Taiwan       | 0, M2                             | Plasma (NR)<br>Culture supernatant (NR) | Culture (NR)                                                                        |



|                |                        |                                                                                                         |      |              |                          |                                         |                                                                                     |
|----------------|------------------------|---------------------------------------------------------------------------------------------------------|------|--------------|--------------------------|-----------------------------------------|-------------------------------------------------------------------------------------|
| IL-21          | Feng (2020)            | IL-21 – 7-Plex Human ProcartaPlex Panel (Affymetrix eBioscience)                                        | (51) | Taiwan       | 0, W8                    | Peripheral blood (frozen)               | Culture (NR)<br>Smear microscopy (NR)                                               |
|                | Kumar (2017)           | IL-21 Quantikine ELISA kit (R&D Systems)                                                                | (52) | India        | 0, M6                    | Plasma (fresh)                          | Culture (NR)                                                                        |
| IL-22          | Feng (2020)            | IL-22 – 7-Plex Human ProcartaPlex Panel (Affymetrix eBioscience)                                        | (51) | Taiwan       | 0, W8                    | Peripheral blood (frozen)               | Culture (NR)<br>Smear microscopy (NR)                                               |
|                | Lee (2015)             | IL-22 – Bioplex Multiplex Suspension Array System (Bio-Rad Laboratories)                                | (31) | Taiwan       | 0, M2                    | Plasma (NR)<br>Culture supernatant (NR) | Culture (NR)                                                                        |
| IL-23          | Feng (2020)            | IL-23 – 7-Plex Human ProcartaPlex Panel (Affymetrix eBioscience)                                        | (51) | Taiwan       | 0, W8                    | Peripheral blood (frozen)               | Culture (NR)<br>Smear microscopy (NR)                                               |
| IP-10 (CXCL10) | Chen (2011)            | IP-10 ELISA (R&D Systems)                                                                               | (40) | Taiwan       | 0, M2, M6                | Serum (NR)                              | Solid culture (LJ)<br>Liquid culture (MGIT)<br>Smear microscopy (ZN)<br>Chest X-ray |
|                | Chung (2016)           | IP-10 ELISA (R&D systems, Minneapolis, MN)                                                              | (30) | South Korea  | 0, M2                    | Serum (frozen)                          | Culture (NR)<br>Smear microscopy (NR)<br>Clinical outcome<br>Chest X-ray            |
|                | Djoba Siawaya (2009)   | IP-10 – Lincoplex human cytokine 29-plex assays (Millipore)                                             | (34) | South Africa | 0, W1, W5, W13, W26      | Plasma (frozen)                         | Liquid culture (BACTEC 460T)<br>Smear microscopy (NR)                               |
|                | Ferrian (2017)         | IP-10 on a multiplex (ProcartaPlex Human kits, eBioscience) read on a luminometer (Bioplex 200, BioRad) | (22) | South Africa | 0, M2, M4, M6            | Plasma (frozen)                         | Smear microscopy (NR)<br>Liquid culture (MGIT 960)                                  |
|                | Francisco (2017)       | ELISA kit (Raybiotech, Inc.)                                                                            | (23) | China        | 0, M4, M6, M7            | Whole blood (NR)                        | Clinical outcome                                                                    |
|                | Garcia-Basteiro (2017) | IP-10 ELISA kit (Becton Dickinson and Company)                                                          | (55) | Mozambique   | 0, D7, D60               | Serum (frozen)                          | Smear microscopy (ZN)<br>GeneXpert (MTB/RIF)<br>Liquid culture (MGIT 960)           |
|                | Hong (2013)            | IP-10 ELISA kit (R&D Systems)                                                                           | (56) | South Korea  | 0/within W2, after M6-M9 | Serum (NR)                              | Culture (NR)<br>Chest X-ray<br>CT scan                                              |

|                                                    |                      |                                                                                                                   |      |              |                                         |                                            |                                                                      |
|----------------------------------------------------|----------------------|-------------------------------------------------------------------------------------------------------------------|------|--------------|-----------------------------------------|--------------------------------------------|----------------------------------------------------------------------|
|                                                    | Jayakumar (2015)     | IP-10 ELISA kit (R&D Systems)                                                                                     | (24) | Uganda       | 0, W8, W20                              | Serum (frozen)                             | Solid culture (NR)<br>Liquid culture (MGIT 960)                      |
|                                                    | Kabeer (2011)        | IP-10 ELISA kit (R&D Sysytems) in response to QFT-IT and RD1                                                      | (57) | India        | 0, M6                                   | Plasma (fresh)                             | Solid culture (LJ)<br>Liquid culture (BacT)                          |
|                                                    | Kim (2018)           | IP-10 ELISA kit (R&D Systems, Minneapolis, MN, USA)                                                               | (58) | South Korea  | 0, M6, M12                              | Urine (NR),<br>Serum (NR)                  | Culture (NR)<br>Chest X-ray                                          |
|                                                    | Matsushita (2015)    | IP-10 – 27-plex assay on the Bio-Plex Suspension Array System (Bio-Rad)                                           | (45) | Vietnam      | 0, M2, M7                               | Plasma (frozen)                            | Smear microscopy (NR)<br>Chest X-ray                                 |
|                                                    | Riou (2012)          | IP-10 – Multiplex bead array (Bulletin# 10014905 Bio-Rad) on a luminometer (Luminex)                              | (35) | South Africa | 0, W2, W4, W8,<br>W12, W26,<br>W52, W78 | Plasma (frozen)                            | Solid culture (LJ)<br>Liquid culture (MGIT)<br>Smear microscopy (FM) |
|                                                    | Zhu (2015)           | IP-10 ELISA kit (eBioscience)                                                                                     | (54) | China        | 0, W2-8                                 | Plasma (frozen)                            | Smear microscopy (NR)                                                |
| KL-6                                               | Djoba Siawaya (2009) | KL-6 ELISA kit (Sanko Junyaku)                                                                                    | (34) | South Africa | 0, W1, W5,<br>W13, W26                  | Plasma (frozen)                            | Liquid culture (BACTEC 460T)                                         |
| Leukocyte immunoglobulin like receptor B4 (LILRB4) | Zhao (2019)          | SLAMF8 ELISA kit (accession #: Q8NHJ6; RayBiotech)                                                                | (53) | China        | 0, W1, W2, W3,<br>W4, W5, W6,<br>W7, W8 | Peripheral blood mononuclear cells (fresh) | Smear microscopy (NR)                                                |
| Lipoarabinomannan (LAM)                            | Drain (2015)         | Determine TB LAM test (Alere Inc.)                                                                                | (59) | South Africa | 0, M2, EOT                              | Urine (frozen)                             | Liquid culture (MGIT)<br>Solid culture (NR)<br>Clinical outcome      |
|                                                    | Kawasaki (2019)      | LAM ELISA kit (Otsuka Pharmaceuticals)                                                                            | (60) | Philippines  | 0, D7, D14,<br>D28, D56                 | Sputum (NR)                                | Liquid culture (MGIT)<br>Smear microscopy (NR)<br>TB-LAMP            |
|                                                    | Wood (2012)          | LAM ELISA kit (Alere Health Services)                                                                             | (61) | South Africa | 0, W1, W2, W8,<br>W16, W24              | Urine (frozen)                             | GeneXpert (MTB/RIF)                                                  |
|                                                    | Feruglio (2013)      | Limulus amebocyte lysate colorimetric assay (Lonza) to detect TB-LAM from the LAM ELISA kit (Wuhan Eiaab Science) | (62) | Norway       | 0, W2, W8, W24                          | Plasma (frozen)                            | Culture (NR)<br>Smear microscopy (NR)                                |
| Lipocalcin-2                                       | Choi (2016)          | Lipocalcin-2 – Millipore Human Cytokine/ Chemokine Magnetic Bead Panel (HCYTOMAG-60 K-02)                         | (33) | South Korea  | 0, M2, M6                               | Serum (fresh)                              | Solid culture (NR)<br>Liquid culture (NR)<br>Smear microscopy (NR)   |
|                                                    | Choi (2016)          | MIP-1 $\alpha$ – Millipore Human Cytokine/ Chemokine Magnetic                                                     | (33) | South Korea  | 0, M2, M6                               | Serum (fresh)                              | Solid culture (NR)<br>Liquid culture (NR)                            |

|                                        |                      |                                                                                                         |      |                                            |                                   |                                         |                                                                                    |
|----------------------------------------|----------------------|---------------------------------------------------------------------------------------------------------|------|--------------------------------------------|-----------------------------------|-----------------------------------------|------------------------------------------------------------------------------------|
| Macrophage inflammatory proteins (MIP) |                      | Bead Panel (HCYTOMAG-60 K-02)                                                                           |      |                                            |                                   |                                         | Smear microscopy (NR)                                                              |
|                                        | Djoba Siawaya (2009) | MIP-1 $\alpha$ & MIP-1 $\beta$ – Lincoplex human cytokine 29-plex assays (Millipore)                    | (34) | South Africa                               | 0, W1, W5, W13, W26               | Plasma (frozen)                         | Liquid culture (BACTEC 460T)<br>Smear microscopy (NR)                              |
|                                        | Riou (2012)          | MIP-1 $\beta$ – Multiplex bead array (Bulletin# 10014905 Bio-Rad) on a luminometer (Luminex)            | (35) | South Africa                               | 0, W2, W4, W8, W12, W26, W52, W78 | Plasma (frozen)                         | Solid culture (LJ)<br>Liquid culture (MGIT)<br>Smear microscopy (FM)               |
| Matrix metalloproteinase (MMP)         | Lee (2015)           | MMP-8 – Bioplex Multiplex Suspension Array System (Bio-Rad Laboratories)                                | (31) | Taiwan                                     | 0, M2                             | Plasma (NR)<br>Culture supernatant (NR) | Culture (NR)                                                                       |
|                                        | Sigal (2017)         | MMP-8 – TB Panel 4 custom designed (Meso Scale Diagnostics)                                             | (28) | North America, Spain, South Africa, Uganda | 0, W8, W12                        | Serum (frozen)                          | Solid culture (LJ)<br>Liquid culture (MGIT 960)<br>Clinical outcome<br>Chest X-ray |
|                                        | Ugarte-Gil (2013)    | MMP-1, -2, -3, -7, -8, -9 using Luminex multiplex array (R&D Systems)                                   | (63) | Peru                                       | 0, W2, W8, W24                    | Sputum (frozen)                         | Liquid culture (NR)<br>Clinical outcome<br>Smear microscopy (FM)                   |
| Monocyte chemotactic protein1 (MCP-1)  | Djoba Siawaya (2009) | MCP-1 – Lincoplex human cytokine 29-plex assays (Millipore)                                             | (34) | South Africa                               | 0, W1, W5, W13, W26               | Plasma (frozen)                         | Liquid culture (BACTEC 460T)<br>Smear microscopy (NR)                              |
|                                        | Ferrian (2017)       | MCP-1 on a multiplex (ProcartaPlex Human kits, eBioscience) read on a luminometer (Bioplex 200, BioRad) | (22) | South Africa                               | 0, M2, M4, M6                     | Plasma (frozen)                         | Smear microscopy (NR)<br>Liquid culture (MGIT 960)<br>Line probe assay (Hain)      |
|                                        | Riou (2012)          | MCP-1 – Multiplex bead array (Bulletin# 10014905 Bio-Rad) on a luminometer (Luminex)                    | (35) | South Africa                               | 0, W2, W4, W8, W12, W26, W52, W78 | Plasma (frozen)                         | Solid culture (LJ)<br>Liquid culture (MGIT)<br>Smear microscopy (FM)               |
| Neopterin                              | Altunoglu (2014)     | Neopterin ELISA KIT (Immuno-Biological Laboratories)                                                    | (10) | Turkey                                     | 0, M2                             | Serum (frozen)                          | Smear microscopy (NR)                                                              |
|                                        | Jayakumar (2015)     | Neopterin ELISA kit (Immuno-Biological Laboratories)                                                    | (24) | Uganda                                     | W0, W8, W20                       | Serum (frozen)                          | Solid culture (NR)<br>Liquid culture (MGIT 960)                                    |
|                                        | Mendy (2016)         | Neopterin ELISA kit (Immuno-Biological Laboratories)                                                    | (15) | Gambia                                     | 0, M2, M6                         | Plasma (frozen)                         | Liquid culture (MGIT)<br>Smear microscopy (ZN)<br>Chest X-ray                      |
| Osteopontin (OPN)                      | Zhu (2015)           | OPN ELISA kit (R&D Systems)                                                                             | (54) | China                                      | 0, W2-8                           | Plasma (frozen)                         | Smear microscopy (NR)                                                              |

|                                                          |                      |                                                                                                       |      |                                            |                                   |                                            |                                                                                    |
|----------------------------------------------------------|----------------------|-------------------------------------------------------------------------------------------------------|------|--------------------------------------------|-----------------------------------|--------------------------------------------|------------------------------------------------------------------------------------|
| Pentraxin-3 (PTX-3)                                      | Sigal (2017)         | PTX-3 – TB Panel 2 custom designed (Meso Scale Diagnostics)                                           | (28) | North America, Spain, South Africa, Uganda | 0, W8, W12                        | Serum (frozen)                             | Solid culture (LJ)<br>Liquid culture (MGIT 960)<br>Clinical outcome<br>Chest X-ray |
| Procalcitonin                                            | Osawa (2020)         | μTASWako i30 immunoanalyzer (Fujifilm Wako Pure Chemical)                                             | (64) | South Africa                               | 0, D7, D14, D28                   | Serum (NR)                                 | Smear microscopy (NR)<br>Chest X-ray                                               |
| Platelet derived growth factor (PDGF) BB                 | Riou (2012)          | PDGF-BB – Multiplex bead array (Bulletin# 10014905 Bio-Rad) on a luminometer (Luminex)                | (35) | South Africa                               | 0, W2, W4, W8, W12, W26, W52, W78 | Plasma (frozen)                            | Solid culture (LJ)<br>Liquid culture (MGIT)<br>Smear microscopy (FM)               |
| RANTES                                                   | Lee (2015)           | RANTES – Bioplex Multiplex Suspension Array System (Bio-Rad Laboratories)                             | (31) | Taiwan                                     | 0, M2                             | Plasma (NR)<br>Culture supernatant (NR)    | Culture (NR)                                                                       |
| Resistin                                                 | Ehtesham (2011)      | Human resistin ELISA kit (AdipoGen)                                                                   | (41) | India                                      | 0, M2, M4, M6                     | Serum (frozen)                             | Clinical outcome                                                                   |
| sCD14                                                    | Feruglio (2013)      | sCD14 ELISA kit (R&D Systems)                                                                         | (62) | Norway                                     | 0, W2, W8, W24                    | Plasma (frozen)                            | Culture (NR)<br>Smear microscopy (NR)                                              |
| sCD40L                                                   | Djoba Siawaya (2009) | sCD40L – Lincoplex human cytokine 29-plex assays (Millipore)                                          | (34) | South Africa                               | 0, W1, W5, W13, W26               | Plasma (frozen)                            | Liquid culture (BACTEC 460T)<br>Smear microscopy (NR)                              |
| sICAM-1                                                  | Djoba Siawaya (2008) | sICAM-1 ELISA kit (R&D Systems)                                                                       | (21) | South Africa                               | 0, W1, W5, W13, W26               | Serum (frozen)                             | Chest X-ray<br>Liquid culture (BACTEC)                                             |
|                                                          | Jayakumar (2015)     | sICAM-1 ELISA kit (R&D Systems)                                                                       | (24) | Uganda                                     | 0, W8, W20                        | Serum (frozen)                             | Solid culture (NR)<br>Liquid culture (MGIT 960)                                    |
| Serum amyloid A (SAA) and serum amyloid protein A (SAA1) | Ferrian (2017)       | SAA on a multiplex (ProcartaPlex Human kits, eBioscience) read on a luminometer (Bioplex 200, BioRad) | (22) | South Africa                               | 0, M2, M4, M6                     | Plasma (frozen)                            | Smear microscopy (NR)<br>Liquid culture (MGIT 960)<br>Line probe assay (Hain)      |
|                                                          | Sigal (2017)         | SAA1 – V-PLEX Human Vascular Injury Panel 2 (Meso Scale Diagnostics)                                  | (28) | North America, Spain, South Africa, Uganda | 0, W8, W12                        | Serum (frozen)                             | Solid culture (LJ)<br>Liquid culture (MGIT 960)<br>Clinical outcome<br>Chest X-ray |
| SLAMF8                                                   | Zhao (2019)          | SLAMF8 ELISA kit (accession #: Q9P0V8; RayBiotech)                                                    | (53) | China                                      | 0, W1, W2, W3, W4, W5, W6, W7, W8 | Peripheral blood mononuclear cells (fresh) | Smear microscopy (NR)                                                              |
| Small RNA (smRNA) and microRNA (miRNA)                   | Barry (2018)         | 5 plasma miRNA<br>10 plasma miRNA                                                                     | (65) | China                                      | 0, M1, M2, M6                     | Plasma (frozen)                            | Culture (NR)<br>Smear microscopy (NR)<br>Chest X-ray<br>Clinical outcome           |

|                                                               |                      |                                                                                                               |      |               |                       |                 |                                                                               |
|---------------------------------------------------------------|----------------------|---------------------------------------------------------------------------------------------------------------|------|---------------|-----------------------|-----------------|-------------------------------------------------------------------------------|
|                                                               | Honeyborne (2015)    | miR-29A, SNORD61, miR-17-3p, miR-133a using Rotorgene-100 human serum/plasma MIHS-106Z arrays (SABiosciences) | (66) | South Africa  | 0, W24                | Plasma (frozen) | Culture (NR)                                                                  |
| Soluble death receptor (sDR)                                  | Djoba Siawaya (2008) | sDR5 – BioPlex bead array system (Bio-Rad Laboratories) on Luminex                                            | (21) | South Africa  | 0, W1, W5, W13, W26   | Serum (frozen)  | Chest X-ray<br>Liquid culture (BACTEC)                                        |
| Soluble lymphocyte activation gene-3 (sLAG-3)                 | Djoba Siawaya (2008) | sLAG-3 ELISA kit (Apotech)                                                                                    | (21) | South Africa  | 0, W1, W5, W13, W26   | Serum (frozen)  | Chest X-ray<br>Liquid culture (BACTEC)                                        |
| Soluble receptor analytes                                     | Choi (2016)          | sIL-2Ra – Millipore Human Cytokine/ Chemokine Magnetic Bead Panel (HCYTOMAG-60 K-02)                          | (33) | South Korea   | 0, M2, M6             | Serum (fresh)   | Solid culture (NR)<br>Liquid culture (NR)<br>Smear microscopy (NR)            |
|                                                               | Ferrian (2017)       | sIL2Ra on a multiplex (ProcartaPlex Human kits, eBioscience) read on a luminometer (Bioplex 200, BioRad)      | (22) | South Africa  | 0, M2, M4, M6         | Plasma (frozen) | Smear microscopy (NR)<br>Liquid culture (MGIT 960)<br>Line probe assay (Hain) |
|                                                               | Jayakumar (2015)     | sIL-2Ra, sTNF-R1, and sTNF-R2 on the Luminex 100 multiplex platform (Millipore Corporation)                   | (24) | Uganda        | 0, W8, W20            | Serum (frozen)  | Solid culture (NR)<br>Liquid culture (MGIT 960)                               |
|                                                               | Luo (2018)           | sIL-2R ELISA kit (Siemens Healthcare Diagnostics)                                                             | (49) | China         | 0, M2                 | Serum (fresh)   | Smear microscopy (FM)                                                         |
|                                                               | Nie (2020)           | sIL-2R ELISA kit (BioLegend)                                                                                  | (44) | China         | 0, M1-2, M6           | Serum (frozen)  | Culture (NR)<br>Smear microscopy (NR)<br>CT scan                              |
| Soluble tumor necrosis factor receptor (sTNFR)                | Djoba Siawaya (2008) | sTNF I, sTNFR II – BioPlex bead array system (Bio-Rad Laboratories) on Luminex                                | (21) | South Africa  | 0, W1, W5, W13, W26   | Serum (frozen)  | Chest X-ray<br>Liquid culture (BACTEC)                                        |
| Soluble urokinase-type plasminogen activator receptor (suPAR) | Jayakumar (2015)     | suPAR ELISA kit (ViroGates)                                                                                   | (24) | Uganda        | 0, W8, W20            | Serum (frozen)  | Solid culture (NR)<br>Liquid culture (MGIT 960)                               |
|                                                               | Rabna (2012)         | suPAR ELISA kit (ViroGates)                                                                                   | (67) | Guinea-Bissau | 0, W2, M1, M2, M5, M8 | Plasma (frozen) | Clinical outcome<br>Smear microscopy (ZN)                                     |
|                                                               | Raras (2010)         | suPAR ELISA kit (ViroGates)                                                                                   | (68) | Indonesia     | 0, M2, M4, M6         | Serum (frozen)  | Clinical outcome<br>Smear microscopy (NR)<br>Chest X-ray                      |

|                                           |                      |                                                                                                             |      |              |                                   |                                                         |                                                                      |
|-------------------------------------------|----------------------|-------------------------------------------------------------------------------------------------------------|------|--------------|-----------------------------------|---------------------------------------------------------|----------------------------------------------------------------------|
|                                           | Ronacher (2019)      | suPAR ELISA kit (Virogates)                                                                                 | (69) | South Africa | 0, W1, W2, W4, W6 W26             | Serum (frozen)                                          | Liquid culture (Bactec 460)                                          |
|                                           | Djoba Siawaya (2008) | suPAR ELISA kit (ViroGates)                                                                                 | (21) | South Africa | 0, W1, W5, W13, W26               | Serum (frozen)                                          | Chest X-ray<br>Liquid culture (BACTEC)                               |
| TGF- $\beta$ 1                            | Chowdhury (2014)     | TGF- $\beta$ 1 ELISA Kit (RayBiotech)                                                                       | (42) | India        | 0, M2, M4, M6                     | Serum (NR)                                              | Smear microscopy (ZN)<br>Chest X-ray                                 |
| Tissue inhibitor metalloproteinase (TIMP) | Ugarte-Gil (2013)    | TIMP-1 & TIMP-2 using ELISA kit (R&D Systems)                                                               | (63) | Peru         | 0, W2, W8, W24                    | Sputum (frozen)                                         | Liquid culture (NR)<br>Clinical outcome<br>Smear microscopy (FM)     |
| TNF- $\alpha$                             | Chowdhury (2014)     | TNF- $\alpha$ high sensitivity human ELISA set (ImmunoTools)                                                | (42) | India        | 0, M2, M4, M6                     | Serum (NR)                                              | Smear microscopy (ZN)<br>Chest X-ray                                 |
|                                           | Djoba Siawaya (2009) | TNF- $\alpha$ – Lincoplex human cytokine 29-plex assays (Millipore)                                         | (34) | South Africa | 0, W1, W5, W13, W26               | Plasma (frozen)                                         | Liquid culture (BACTEC 460T)<br>Smear microscopy (NR)                |
|                                           | Luo (2018)           | TNF- $\alpha$ ELISA kit (Siemens Healthcare Diagnostics)                                                    | (49) | China        | 0, M2                             | Serum (fresh)                                           | Smear microscopy (FM)                                                |
|                                           | Mvungi (2019)        | TNF- $\alpha$ – multiplex assay (Human Premixed Multi-Analyte Kit; cat. # LXSAHM) on the Luminex 200 system | (46) | Tanzania     | 0, M2                             | Plasma (frozen) prepared using QuantiFERON-TB Gold Plus | Clinical outcome                                                     |
|                                           | Nie (2020)           | TNF- $\alpha$ ELISA kit (BioLegend)                                                                         | (44) | China        | 0, M1-2, M6                       | Serum (frozen)                                          | Culture (NR)<br>Smear microscopy (NR)<br>Chest computed tomography   |
|                                           | Riou (2012)          | TNF- $\alpha$ – Multiplex bead array (Bulletin# 10014905 Bio-Rad) on a luminometer (Luminex))               | (35) | South Africa | 0, W2, W4, W8, W12, W26, W52, W78 | Plasma (frozen)                                         | Solid culture (LJ)<br>Liquid culture (MGIT)<br>Smear microscopy (FM) |
|                                           | Zhu (2015)           | TNF- $\alpha$ ELISA kit (eBioscience)                                                                       | (54) | China        | 0, W2-8                           | Plasma (frozen)                                         | Smear microscopy (NR)                                                |
| Transcriptomic/<br>gene signatures        | Bloom (2012)         | 664-transcript signature<br>320-transcript signature                                                        | (70) | South Africa | 0, W2, M2, M6, M12                | Whole blood (frozen)                                    | Clinical outcome<br>Chest X-ray                                      |
|                                           | Darboe (2019)        | RISK11 signature                                                                                            | (71) | South Africa | 0, M2, M6, M8, M14                | Whole blood (NR)                                        | Culture (NR)                                                         |
|                                           | Francisco (2017)     | 3-gene signature ( <i>GBP5</i> , <i>DUSP3</i> and <i>KLF2</i> )                                             | (23) | China        | 0, M4, M6, M7                     | Whole blood (NR)                                        | Clinical outcome                                                     |
|                                           | Gebremicael (2019)   | 105 genes expression profiling by dual-color Reverse-Transcription Multiplex Ligation-dependent             | (72) | Ethiopia     | 0, M6, M18                        | Whole blood (NR)                                        | Smear microscopy (ZN)                                                |

|                                           |                       |                                                                                                                                                                                                                          |      |                                                    |                                                          |                              |                                                                                               |
|-------------------------------------------|-----------------------|--------------------------------------------------------------------------------------------------------------------------------------------------------------------------------------------------------------------------|------|----------------------------------------------------|----------------------------------------------------------|------------------------------|-----------------------------------------------------------------------------------------------|
|                                           |                       | Probe Amplification (dcRT-MLPA) platform                                                                                                                                                                                 |      |                                                    |                                                          |                              |                                                                                               |
|                                           | Penn-Nicholson (2020) | RISK6 signature                                                                                                                                                                                                          | (73) | South Africa                                       | 0, M2, treatment completion, 6-8 76months post-treatment | Whole blood (frozen)         | Culture (NR)<br>Smear microscopy (NR)<br>GeneXpert (MTB/RIF)                                  |
|                                           | Sivakumaran (2020)    | 198 gene set profiled using dual-colour-Reverse-Transcriptase-Multiplex-Ligation-dependent-Probe-Amplification (dc-RT MLPA) platform                                                                                     | (74) | India                                              | 0, M1, M2, M6                                            | Whole blood (frozen)         | Liquid culture (MGIT)<br>Smear microscopy (FM)<br>Clinical outcome                            |
|                                           | Warsinske (2018)      | 3-gene signature ( <i>GBP5</i> , <i>DUSP3</i> and <i>KLF2</i> )                                                                                                                                                          | (75) | South Africa                                       | 0, W1, W4, W24                                           | Whole blood (NR)             | Liquid culture (MGIT)<br>PET-CT                                                               |
| Vascular endothelial growth factor (VEGF) | Djoba Siawaya (2009)  | VEGF – Lincoplex human cytokine 29-plex assays (Millipore)                                                                                                                                                               | (34) | South Africa                                       | 0, W1, W5, W13, W26                                      | Plasma (frozen)              | Liquid culture (BACTEC 460T)<br>Smear microscopy (NR)                                         |
|                                           | Ferrian (2017)        | VEGF-A on a multiplex (ProcartaPlex Human kits, eBioscience) read on a Bioplex 200 (BioRad)                                                                                                                              | (22) | South Africa                                       | 0, M2, M4, M6                                            | Plasma (frozen)              | Smear microscopy (NR)<br>Liquid culture (MGIT 960)<br>Line probe assay (Hain)                 |
|                                           | Kumar (2016)          | VEGF-A, VEGF-C, VEGF-R1, VEGF-R2 and VEGF-R3 using the DuoSet ELISA Development System (R&D Systems)                                                                                                                     | (76) | India                                              | 0, M6                                                    | Platelet-poor plasma (fresh) | Culture (NR)                                                                                  |
|                                           | Riou (2012)           | VEGF – Multiplex bead array (Bulletin# 10014905 Bio-Rad) on a luminometer (Luminex)                                                                                                                                      | (35) | South Africa                                       | 0, W2, W4, W8, W12, W26, W52, W78                        | Plasma (frozen)              | Solid culture (LJ)<br>Liquid culture (MGIT)<br>Smear microscopy (FM)                          |
| Vitamin B12                               | Gebremicael (2019)    | e601 module for Vitamin B12 on the cobas6000 analyser (Roche Diagnostics Corporation)                                                                                                                                    | (47) | Ethiopia                                           | 0, M6                                                    | Serum (frozen)               | Clinical outcome<br>Smear microscopy (ZN)                                                     |
| White blood cell (WBC) count              | Chedid (2020)         | Bangladesh: Callatac ES Automated Hematology Analyzer, MEK-7300 (Nihon Kohden)<br>Georgia: XT-20001 (Sysmex)<br>Lebanon: CELL-DYN Ruby (Abbot)<br>Madagascar: XT2100i and XN1000 (Sysmex)<br>Paraguay: XT-20001 (Sysmex) | (77) | Bangladesh, Georgia, Lebanon, Madagascar, Paraguay | 0, M2, EOT, EOT+2M                                       | Whole blood (NR)             | Solid culture (LJ)<br>Liquid culture (MGIT)<br>Smear microscopy (ZN)<br>Smear microscopy (FM) |

61 **Table S6: Full list of studies and references included in the quantitative fold-change**  
62 **analyses**  
63

| <b>Biomarker</b>               | <b>Week 8 fold-change</b> |             | <b>Weekly fold-change (meta-regression)</b> |            |
|--------------------------------|---------------------------|-------------|---------------------------------------------|------------|
|                                | <b>Author (Year)*</b>     | <b>Ref</b>  | <b>Author (Year)</b>                        | <b>Ref</b> |
| <b>CRP</b>                     | Almeida (2009)            | (20)        | Almeida (2009)                              | (20)       |
|                                | Ferrian (2017)            | (22)        | Ferrian (2017)                              | (22)       |
|                                | Jayakumar (2015)          | (24)        | Francisco (2017)                            | (23)       |
|                                | Khalil (2020)             | (25)        | Jayakumar (2015)                            | (24)       |
|                                | Miranda (2017)            | (27)        | Khalil (2020)                               | (25)       |
|                                |                           |             | Miranda (2017)                              | (27)       |
|                                |                           |             | De Moraes (2014)                            |            |
| <b>IL-6</b>                    | Chowdhury (2014)          | (42)        | Chowdhury (2014)                            | (42)       |
|                                | Feng (2020)               | (51)        | Djoba Siawaya (2009)                        | (34)       |
|                                | Luo (2018)                | (49)        | Feng (2020)                                 | (51)       |
|                                | Mvungi (2019)             | (46)        | Luo (2018)                                  | (49)       |
|                                |                           |             | Mvungi (2019)                               | (46)       |
| <b>IP-10</b>                   | Chen (2011)               | (40)        | Chen (2011)                                 | (40)       |
|                                | Ferrian (2017)            | (22)        | Djoba Siawaya (2009)                        | (34)       |
|                                | Jayakumar (2015)          | (24)        | Ferrian (2017)                              | (22)       |
|                                | Kim (2018)                | (58)        | Francisco (2017)                            | (23)       |
|                                |                           |             | Garcia-Basteiro (2017)                      | (55)       |
|                                |                           |             | Hong (2013)                                 | (56)       |
|                                |                           |             | Jayakumar (2015)                            | (24)       |
|                                |                           |             | Kim (2018)                                  | (58)       |
|                                |                           | Riou (2012) | (35)                                        |            |
| <b>TNF-<math>\alpha</math></b> | Chowdhury (2014)          | (42)        | Chowdhury (2014)                            | (42)       |
|                                | Luo (2018)                | (49)        | Djoba Siawaya (2009)                        | (34)       |
|                                | Mvungi (2019)             | (46)        | Luo (2018)                                  | (49)       |
|                                | Nie (2020)                | (44)        | Mvungi (2019)                               | (46)       |
|                                |                           |             | Nie (2020)                                  | (44)       |
|                                |                           |             | Zhu (2015)                                  | (54)       |

64 \* Only papers that included week 8 data were included in this analysis.  
65  
66



67 **Figure S7: Fold-changes plots for individual studies of CRP, IP-10, IL-6 and TNF- $\alpha$**

68

69 **CRP**

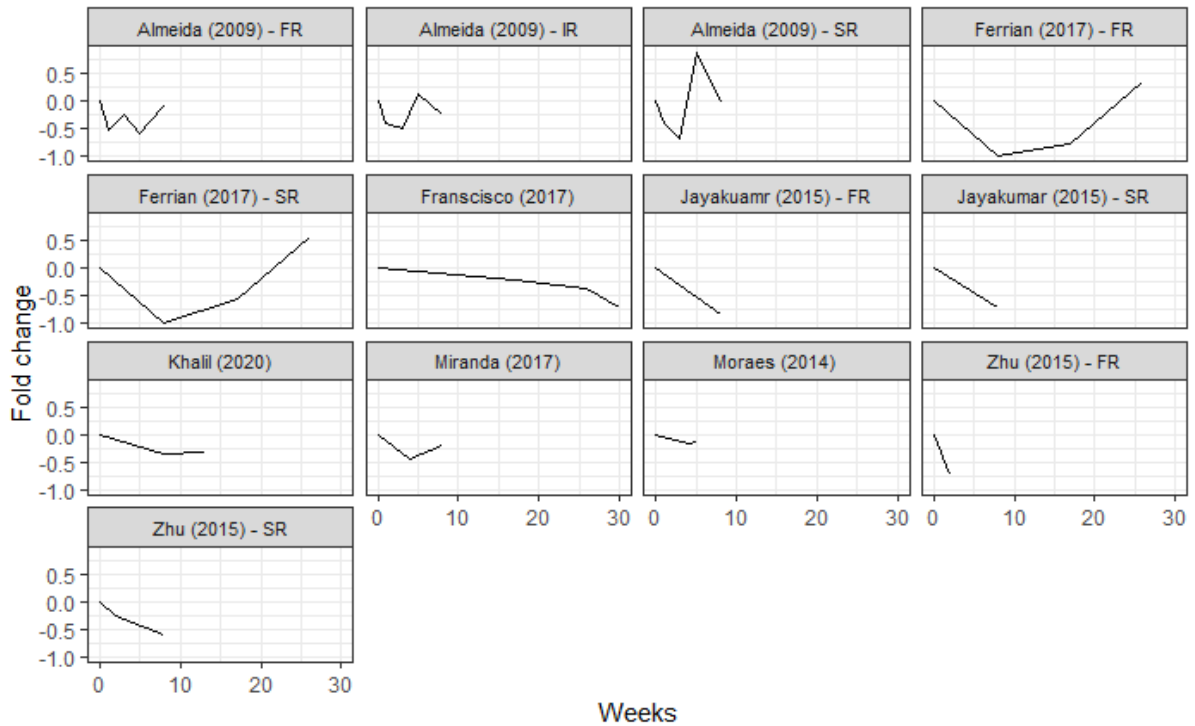

70

71 **Figure S7.1: CRP fold change among TB patients on treatment across different studies. Fold**

72 change is relative to the previous time point reported in the study. FR – fast responders; IR –

73 intermediate responders, SR – slow responders.

74

75

76

77 **IL-6**

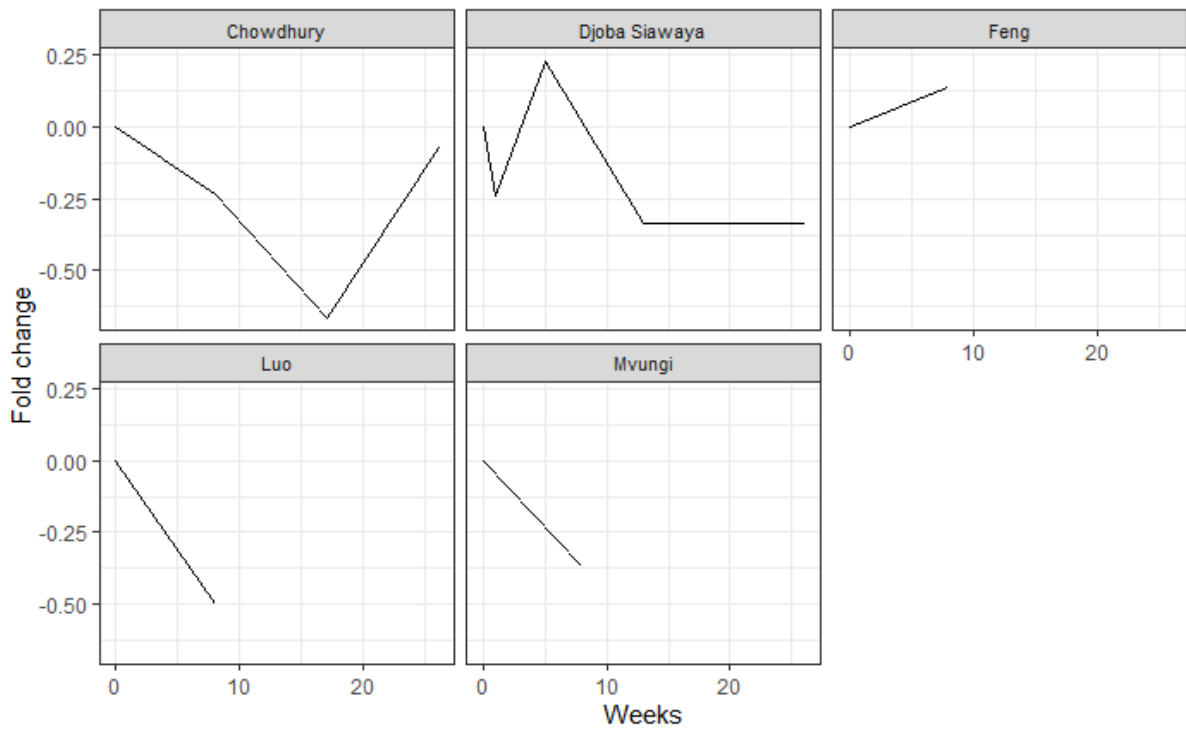

78

79 **Figure S7.2:** IL-6 change among TB patients on treatment across different studies. Fold change  
80 is relative to the previous time point reported in the study.

81

82

83

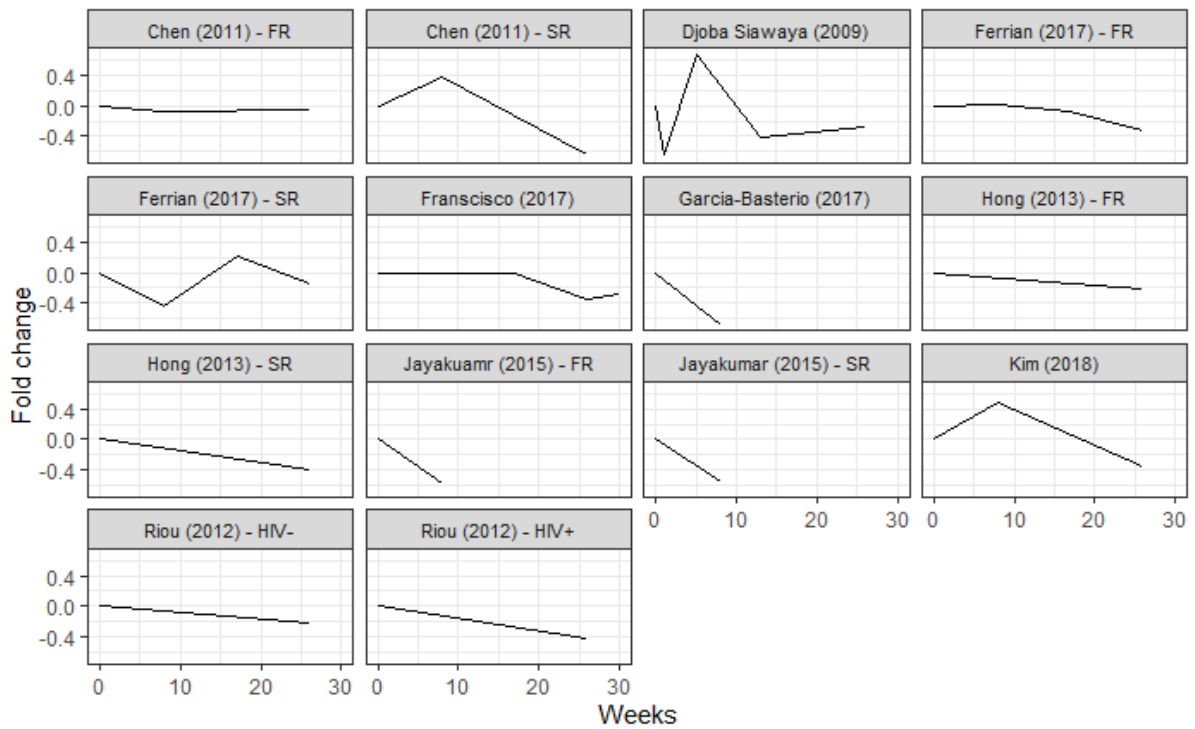

85

86 **Figure S7.3:** IP-10 fold change among TB patients on treatment across different studies. Fold  
 87 change is relative to the previous time point reported in the study. FR – fast responders; SR –  
 88 slow responders.

89

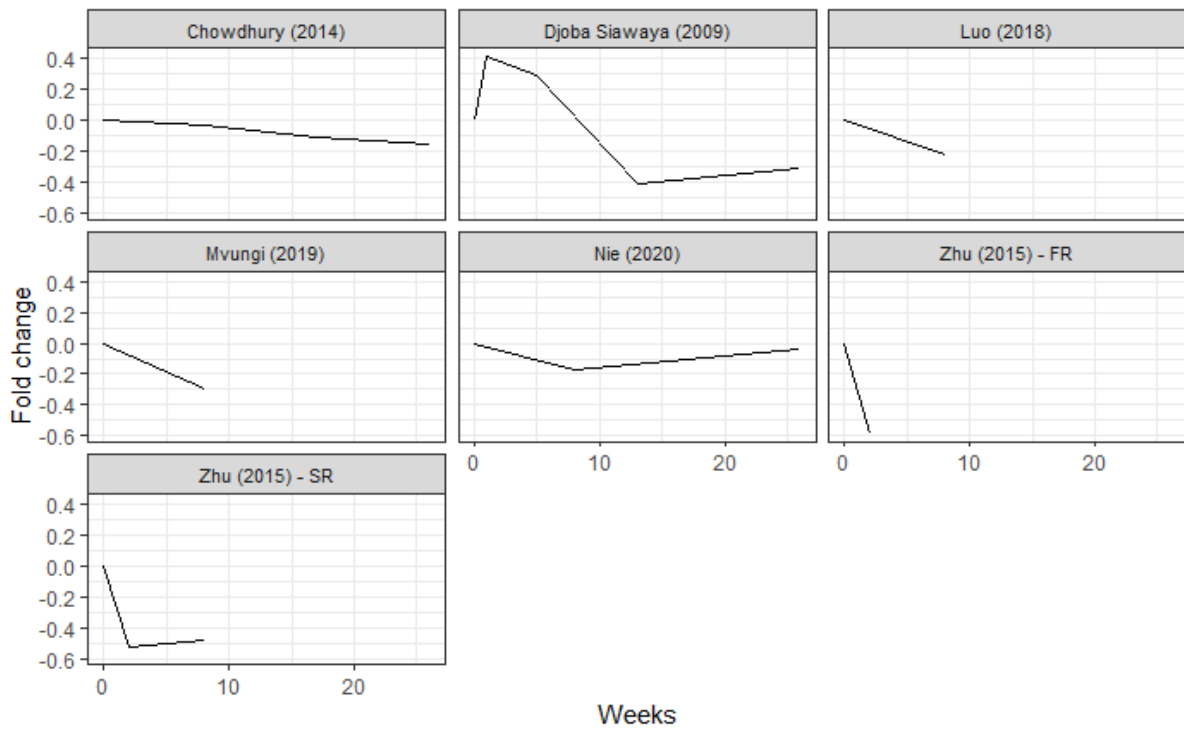

91

92 **Figure S7.4:** TNF- $\alpha$  fold change among TB patients on treatment across different studies. Fold  
 93 change is relative to the previous time point reported in the study. FR – fast responders; SR –  
 94 slow responders.

95

96 **Table S8: Sensitivity analysis for the weekly fold-change meta-regression with varying**  
 97 **correlation coefficient ( $\rho$ ) parameter**  
 98

|                                | <b>Correlation coefficient (<math>\rho</math>)</b><br><b>(95% CI)</b> |                            |                            |                            |
|--------------------------------|-----------------------------------------------------------------------|----------------------------|----------------------------|----------------------------|
|                                | <b>0</b>                                                              | <b>0.25</b>                | <b>0.5</b>                 | <b>0.75</b>                |
| <b>CRP</b>                     | -0.546<br>(-0.702, -0.390)                                            | -0.547<br>(-0.705, -0.389) | -0.539<br>(-0.702, -0.375) | -0.558<br>(-0.714, -0.401) |
| <b>IL-6</b>                    | -0.317<br>(-0.595, -0.038)                                            | -0.313<br>(-0.596, -0.031) | -0.310<br>(-0.595, -0.025) | -0.306<br>(-0.592, -0.019) |
| <b>IP-10</b>                   | -0.357<br>(-0.497, -0.218)                                            | -0.361<br>(-0.495, -0.227) | -0.362<br>(-0.490, -0.234) | -0.367<br>(-0.494, -0.241) |
| <b>TNF-<math>\alpha</math></b> | -0.119<br>(-0.171, -0.067)                                            | -0.150<br>(-0.248, -0.053) | -0.177<br>(-0.313, -0.040) | -0.149<br>(-0.227, -0.071) |

99  
100  
101  
102  
103

**Table S9: Meta-analysis of outcome is the fold-change from previous recorded  
timepoint sensitivity analysis for CRP (excluding Ferrian et al.)**

| <b>Biomarker</b> | <b>Estimate (95% CI)</b> |
|------------------|--------------------------|
| CRP <sup>1</sup> | -0.539 (-0.702, -0.375)  |
| CRP <sup>2</sup> | -0.453 (-0.594, -0.313)  |

104 <sup>1</sup>Including Ferrian et al.  
 105 <sup>2</sup>Excluding Ferrian et al.

106  
107  
108  
109  
110

**Table S10: Meta-regression where the outcome is the fold-change from baseline and the  
predictor is treatment duration.**

| <b>Biomarker</b> | <b>Estimate (95% CI)</b>   |
|------------------|----------------------------|
| CRP <sup>1</sup> | -0.0001 (-0.0002, 0.0001)  |
| CRP <sup>2</sup> | -0.0518 (-0.0552, -0.0484) |
| IL-6             | -0.0158 (-0.0160, -0.0156) |
| IP-10            | -0.0320 (-0.0354, -0.0285) |
| TNF- $\alpha$    | -0.0094 (-0.0137, -0.0051) |

111  
112

113 **Supplementary references**

114

- 115 1. Hai HT, Vinh DN, Thu DDA, Hanh NT, Phu NH, Srinivasan V, et al. Comparison of  
116 the Mycobacterium tuberculosis molecular bacterial load assay, microscopy and  
117 GeneXpert versus liquid culture for viable bacterial load quantification before and  
118 after starting pulmonary tuberculosis treatment. *Tuberculosis*. 2019 Dec 1;119:101864.
- 119 2. Honeyborne I, McHugh TD, Phillips PPJ, Bannoo S, Bateson A, Carroll N, et al.  
120 Molecular bacterial load assay, a culture-free biomarker for rapid and accurate  
121 quantification of sputum Mycobacterium tuberculosis bacillary load during treatment.  
122 *J Clin Microbiol* [Internet]. 2011 Nov [cited 2021 Jun 20];49(11):3905–11. Available  
123 from: <https://journals.asm.org/journal/jcm>
- 124 3. Honeyborne I, Mtafya B, Phillips PPJ, Hoelscher M, Ntinginya EN, Kohlenberg A, et  
125 al. The molecular bacterial load assay replaces solid culture for measuring early  
126 bactericidal response to antituberculosis treatment. *J Clin Microbiol* [Internet]. 2014  
127 [cited 2021 Jun 20];52(8):3064–7. Available from: <https://journals.asm.org/journal/jcm>
- 128 4. Sabiiti W, Azam K, Farmer ECW, Kuchaka D, Mtafya B, Bowness R, et al.  
129 Tuberculosis bacillary load, an early marker of disease severity: The utility of  
130 tuberculosis Molecular Bacterial Load Assay. *Thorax* [Internet]. 2020 Jul 1 [cited 2021  
131 Jun 21];75(7):606–8. Available from: <https://www>.
- 132 5. Yan L, Xiao H, Zhang Q. Using simultaneous amplification and testing method for  
133 evaluating the treatment outcome of pulmonary tuberculosis. *BMC Infect Dis*  
134 [Internet]. 2018 Oct 11 [cited 2021 Jun 21];18(1):1–7. Available from:  
135 <https://doi.org/10.1186/s12879-018-3424-y>
- 136 6. Atahan E, Saribas S, Demirci M, Babalık A, Akkus S, Balıkcı A, et al. Evaluating the  
137 effectiveness of anti-tuberculosis treatment by detecting Mycobacterium tuberculosis  
138 85B messenger RNA expression in sputum. *J Infect Public Health*. 2020 Oct  
139 1;13(10):1490–4.
- 140 7. Montenegro RA, Guarines KM, Montenegro LML, Lira LAS, Falcão J, Melo FL, et al.  
141 Assessment of messenger RNA (mRNA) of Mycobacterium tuberculosis as a marker  
142 of cure in patients with pulmonary tuberculosis. *J Appl Microbiol* [Internet]. 2014 Jul  
143 1 [cited 2021 Jun 21];117(1):266–72. Available from: <http://www.ncbi.nlm.nih>.
- 144 8. Mdivani N, Li H, Akhalaia M, Gegia M, Goginashvili L, Kernodle DS, et al.  
145 Monitoring therapeutic efficacy by real-time detection of Mycobacterium tuberculosis  
146 mRNA in sputum. *Clin Chem* [Internet]. 2009 Sep 1 [cited 2021 Jun 21];55(9):1694–  
147 700. Available from: <http://www.clinchem.org/>
- 148 9. Singh UB, Rana T, Kaushik A, Porwal C, Makkar N. Day zero quantitative mRNA  
149 analysis as a prognostic marker in pulmonary tuberculosis category II patients on  
150 treatment. *Clin Microbiol Infect* [Internet]. 2012 Nov 1 [cited 2021 Jun  
151 21];18(11):E473–81. Available from:  
152 <http://www.clinicalmicrobiologyandinfection.com/article/S1198743X14607606/fulltext>
- 153 t
- 154 10. Altunoglu E, Erdenen F, Gelisgen R, Kar O, Korkmaz G, Muderrisoglu C, et al. Serum  
155 Adenosine Deaminase Activity and Neopterin Levels during Therapy in Patients with  
156 Pulmonary Tuberculosis and Community-Acquired Pneumonia. *Istanbul Med J*. 2014  
157 Jun 16;15(2):78–82.
- 158 11. Ige O, Edem VF, Arinola OG. Plasma Adenosine Deaminase Enzyme Reduces with  
159 Treatment of Pulmonary Tuberculosis in Nigerian Patients: Indication for Diagnosis  
160 and Treatment Monitoring. *Niger J Physiol Sci* [Internet]. 2016 [cited 2021 Jun  
161 20];31:53. Available from: [www.njps.com.ng](http://www.njps.com.ng)
- 162 12. De Moraes ML, Ramalho DMDP, Delogo KN, Miranda PFC, Mesquita EDD, De  
163 Melo Guedes De Oliveira HM, et al. Association of serum levels of iron, copper, and  
164 zinc, and inflammatory markers with bacteriological sputum conversion during

- 165 tuberculosis treatment. *Biol Trace Elem Res* [Internet]. 2014 Jun 24 [cited 2021 Jun  
166 21];160(2):176–84. Available from: [https://link.springer.com/article/10.1007/s12011-](https://link.springer.com/article/10.1007/s12011-014-0046-0)  
167 014-0046-0
- 168 13. Jiang TT, Shi LY, Chen J, Wei LL, Li M, Hu YT, et al. Screening and identification of  
169 potential protein biomarkers for evaluating the efficacy of intensive therapy in  
170 pulmonary tuberculosis. *Biochem Biophys Res Commun*. 2018 Sep 18;503(4):2263–  
171 70.
- 172 14. Kumar NP, Velayutham B, Nair D, Babu S. Angiopoietins as biomarkers of disease  
173 severity and bacterial burden in pulmonary tuberculosis. *Int J Tuberc Lung Dis*. 2017  
174 Jan 1;21(1).
- 175 15. Mendy J, Togun T, Owolabi O, Donkor S, Ota MOC, Sutherland JS. C-reactive  
176 protein, Neopterin and Beta2 microglobulin levels pre and post TB treatment in The  
177 Gambia. *BMC Infect Dis* [Internet]. 2016 Mar 8 [cited 2021 Jun 21];16(1):1–6.  
178 Available from: [https://bmcinfectdis.biomedcentral.com/articles/10.1186/s12879-016-](https://bmcinfectdis.biomedcentral.com/articles/10.1186/s12879-016-1447-9)  
179 1447-9
- 180 16. Kim ES, Park KU, Song J, Lim HJ, Cho YJ, Yoon H, et al. The clinical significance of  
181 CA-125 in pulmonary tuberculosis. *Tuberculosis*. 2013 Mar 1;93(2):222–6.
- 182 17. Sahin F, Yildiz P. Serum CA-125: Biomarker of pulmonary tuberculosis activity and  
183 evaluation of response to treatment. *Clin Investig Med*. 2012;35(4).
- 184 18. Said AF, Mohamed BI, El-Sharkawy E, Al-Sherif M. Role of cancer antigen 125 in  
185 active pulmonary tuberculosis. *Egypt J Chest Dis Tuberc*. 2013 Jul 1;62(3):419–24.
- 186 19. Lee GO, Comina G, Hernandez-Cordova G, Naik N, Gayoso O, Ticona E, et al. Cough  
187 dynamics in adults receiving tuberculosis treatment. *PLoS One* [Internet]. 2020 Jun 1  
188 [cited 2021 Jun 21];15(6):e0231167. Available from:  
189 <https://doi.org/10.1371/journal.pone.0231167>
- 190 20. Almeida MLD, Barbieri MA, Gurgel RQ, Abdurrahman ST, Baba UA, Hart CA, et al.  
191  $\alpha$ 1-acid glycoprotein and  $\alpha$ 1-antitrypsin as early markers of treatment response in  
192 patients receiving the intensive phase of tuberculosis therapy. *Trans R Soc Trop Med*  
193 *Hyg* [Internet]. 2009 Jun 1 [cited 2021 Jun 20];103(6):575–80. Available from:  
194 <https://academic.oup.com/trstmh/article/103/6/575/1933610>
- 195 21. Djoba Siawaya JF, Bapela NB, Ronacher K, Veenstra H, Kidd M, Gie R, et al.  
196 Immune parameters as markers of tuberculosis extent of disease and early prediction of  
197 anti-tuberculosis chemotherapy response. *J Infect* [Internet]. 2008 May 1 [cited 2021  
198 Jun 21];56(5):340–7. Available from:  
199 <http://www.journalofinfection.com/article/S0163445308000844/fulltext>
- 200 22. Ferrian S, Manca C, Lubbe S, Conradie F, Ismail N, Kaplan G, et al. A combination of  
201 baseline plasma immune markers can predict therapeutic response in multidrug  
202 resistant tuberculosis. *PLoS One* [Internet]. 2017 May 1 [cited 2021 Jun  
203 20];12(5):e0176660. Available from: <https://doi.org/10.1371/journal.pone.0176660>
- 204 23. Francisco NM, Fang YM, Ding L, Feng S, Yang Y, Wu M, et al. Diagnostic accuracy  
205 of a selected signature gene set that discriminates active pulmonary tuberculosis and  
206 other pulmonary diseases. *J Infect*. 2017 Dec;75(6):499–510.
- 207 24. Jayakumar A, Vittinghoff E, Segal MR, MacKenzie WR, Johnson JL, Gitta P, et al.  
208 Serum biomarkers of treatment response within a randomized clinical trial for  
209 pulmonary tuberculosis. *Tuberculosis*. 2015 Jul 1;95(4):415–20.
- 210 25. Khalil M, Halim H., Abdelazeem M. C-reactive protein versus erythrocyte  
211 sedimentation rate in monitoring multidrug-resistant tuberculosis. *Egypt J Chest Dis*  
212 *Tuberc* [Internet]. 2020 [cited 2021 Jun 20];69(3):458. Available from:  
213 [http://www.ejcdt.eg.net/article.asp?issn=0422-](http://www.ejcdt.eg.net/article.asp?issn=0422-7638;year=2020;volume=69;issue=3;spage=458;epage=465;aulast=Khalil)  
214 7638;year=2020;volume=69;issue=3;spage=458;epage=465;aulast=Khalil
- 215 26. Mesquita EDD, Gil-Santana L, Ramalho D, Tonomura E, Silva EC, Oliveira MM, et  
216 al. Associations between systemic inflammation, mycobacterial loads in sputum and

- 217 radiological improvement after treatment initiation in pulmonary TB patients from  
218 Brazil: A prospective cohort study. *BMC Infect Dis* [Internet]. 2016 Aug 5 [cited 2021  
219 Jun 21];16(1):1–12. Available from:  
220 <https://bmcinfectdis.biomedcentral.com/articles/10.1186/s12879-016-1736-3>
- 221 27. Miranda P, Gil-Santana L, Oliveira MG, Mesquita EDD, Silva E, Rauwerdink A, et al.  
222 Sustained elevated levels of C-reactive protein and ferritin in pulmonary tuberculosis  
223 patients remaining culture positive upon treatment initiation. *PLoS One* [Internet].  
224 2017 Apr 1 [cited 2021 Jun 21];12(4):e0175278. Available from:  
225 <https://doi.org/10.1371/journal.pone.0175278>
- 226 28. Sigal GB, Segal MR, Mathew A, Jarlsberg L, Wang M, Barbero S, et al. Biomarkers of  
227 Tuberculosis Severity and Treatment Effect: A Directed Screen of 70 Host Markers in  
228 a Randomized Clinical Trial. *EBioMedicine* [Internet]. 2017 Nov 1 [cited 2021 Jun  
229 21];25:112–21. Available from: <http://creativecommons.org/licenses/by/4.0/>
- 230 29. Chung W, Lee K, Jung Y, Kim Y, Park J, Sheen S, et al. Serum CXCR3 ligands as  
231 biomarkers for the diagnosis and treatment monitoring of tuberculosis. *Int J Tuberc  
232 Lung Dis*. 2015 Dec 1;19(12):1476–84.
- 233 30. Chung WY, Yoon D, Lee KS, Jung YJ, Kim YS, Sheen SS, et al. The Usefulness of  
234 Serum CXCR3 Ligands for Evaluating the Early Treatment Response in Tuberculosis.  
235 *Med (United States)* [Internet]. 2016 Apr 1 [cited 2021 Jun 20];95(17). Available  
236 from: [https://journals.lww.com/md-](https://journals.lww.com/md-journal/Fulltext/2016/04260/The_Usefulness_of_Serum_CXCR3_Ligands_for.57.aspx)  
237 [journal/Fulltext/2016/04260/The\\_Usefulness\\_of\\_Serum\\_CXCR3\\_Ligands\\_for.57.aspx](https://journals.lww.com/md-journal/Fulltext/2016/04260/The_Usefulness_of_Serum_CXCR3_Ligands_for.57.aspx)
- 238 31. Lee MR, Tsai CJ, Wang WJ, Chuang TY, Yang CM, Chang LY, et al. Plasma  
239 biomarkers can predict treatment response in tuberculosis patients: A prospective  
240 observational study. *Med (United States)* [Internet]. 2015 [cited 2021 Jun  
241 21];94(39):e1628. Available from: [https://journals.lww.com/md-](https://journals.lww.com/md-journal/Fulltext/2015/09050/Plasma_Biomarkers_Can_Predict_Treatment_Response.48.aspx)  
242 [journal/Fulltext/2015/09050/Plasma\\_Biomarkers\\_Can\\_Predict\\_Treatment\\_Response.4](https://journals.lww.com/md-journal/Fulltext/2015/09050/Plasma_Biomarkers_Can_Predict_Treatment_Response.48.aspx)  
243 [8.aspx](https://journals.lww.com/md-journal/Fulltext/2015/09050/Plasma_Biomarkers_Can_Predict_Treatment_Response.48.aspx)
- 244 32. Wang X, Tang J, Wang R, Chen C, Tan S, Yu F, et al. Sputum endothelin-1 level is  
245 associated with active pulmonary tuberculosis and effectiveness of anti-tuberculosis  
246 chemotherapy. *Exp Ther Med* [Internet]. 2016 Mar 1 [cited 2021 Jun 21];11(3):1104–  
247 8. Available from: [http://www.spandidos-](http://www.spandidos-publications.com/10.3892/etm.2016.2980/abstract)  
248 [publications.com/10.3892/etm.2016.2980/abstract](http://www.spandidos-publications.com/10.3892/etm.2016.2980/abstract)
- 249 33. Choi R, Kim K, Kim MJ, Kim SY, Kwon OJ, Jeon K, et al. Serum inflammatory  
250 profiles in pulmonary tuberculosis and their association with treatment response. *J  
251 Proteomics*. 2016 Oct 21;149:23–30.
- 252 34. Djoba Siawaya JF, Beyers N, Van Helden P, Walzl G. Differential cytokine secretion  
253 and early treatment response in patients with pulmonary tuberculosis. *Clin Exp  
254 Immunol* [Internet]. 2009 Apr 1 [cited 2021 Jun 20];156(1):69–77. Available from:  
255 <https://onlinelibrary.wiley.com/doi/full/10.1111/j.1365-2249.2009.03875.x>
- 256 35. Riou C, Perez Peixoto B, Roberts L, Ronacher K, Walzl G, Manca C, et al. Effect of  
257 standard tuberculosis treatment on plasma cytokine levels in patients with active  
258 pulmonary tuberculosis. *PLoS One* [Internet]. 2012 May 14 [cited 2021 Jun  
259 21];7(5):e36886. Available from: [www.plosone.org](http://www.plosone.org)
- 260 36. Ralph AP, Yeo TW, Salome CM, Waramori G, Pontororing GJ, Kenangalem E, et al.  
261 Impaired pulmonary nitric oxide bioavailability in pulmonary tuberculosis:  
262 Association with disease severity and delayed mycobacterial clearance with treatment.  
263 *J Infect Dis* [Internet]. 2013 Aug 15 [cited 2021 Jun 21];208(4):616–26. Available  
264 from: <https://academic.oup.com/jid/article/208/4/616/920444>
- 265 37. Zetola NM, Modongo C, Matsiri O, Tamuhla T, Mbongwe B, Matlhagela K, et al.  
266 Diagnosis of pulmonary tuberculosis and assessment of treatment response through  
267 analyses of volatile compound patterns in exhaled breath samples. *J Infect* [Internet].  
268 2017 Apr 1 [cited 2021 Jun 21];74(4):367–76. Available from:



- 269 <http://www.journalofinfection.com/article/S016344531630336X/fulltext>
- 270 38. Andrade BB, Pavan Kumar N, Mayer-Barber KD, Barber DL, Sridhar R, Rekha VVB,  
271 et al. Plasma Heme Oxygenase-1 Levels Distinguish Latent or Successfully Treated  
272 Human Tuberculosis from Active Disease. *PLoS One* [Internet]. 2013 May 6 [cited  
273 2021 Jun 20];8(5):e62618. Available from: [www.plosone.org](http://www.plosone.org)
- 274 39. Rockwood N, Costa DL, Amaral EP, Du Bruyn E, Kubler A, Gil-Santana L, et al.  
275 *Mycobacterium tuberculosis* induction of heme oxygenase-1 expression is dependent  
276 on oxidative stress and reflects treatment outcomes. *Front Immunol* [Internet]. 2017  
277 May 12 [cited 2021 Jun 21];8(MAY):542. Available from: [www.frontiersin.org](http://www.frontiersin.org)
- 278 40. Chen YC, Chin CH, Liu SF, Wu CC, Tsen CC, Wang YH, et al. Prognostic values of  
279 serum IP-10 and IL-17 in patients with pulmonary tuberculosis. *Dis Markers*.  
280 2011;31(2):101–10.
- 281 41. Ehtesham NZ, Nasiruddin M, Alvi A, Kumar BK, Ahmed N, Peri S, et al. Treatment  
282 end point determinants for pulmonary tuberculosis: Human resistin as a surrogate  
283 biomarker. *Tuberculosis*. 2011 Jul 1;91(4):293–9.
- 284 42. Chowdhury IH, Ahmed AM, Choudhuri S, Sen A, Hazra A, Pal NK, et al. Alteration  
285 of serum inflammatory cytokines in active pulmonary tuberculosis following anti-  
286 tuberculosis drug therapy. *Mol Immunol*. 2014 Nov 1;62(1):159–68.
- 287 43. Siawaya JFD, Bapela NB, Ronacher K, Beyers N, Van Helden P, Walzl G. Differential  
288 Expression of Interleukin-4 (IL-4) and IL-4 $\delta$ 2 mRNA, but Not Transforming Growth  
289 Factor Beta (TGF- $\beta$ ), TGF- $\beta$ RII, Foxp3, Gamma Interferon, T-bet, or GATA-3  
290 mRNA, in Patients with Fast and Slow Responses to Antituberculosis Treatment. *Clin*  
291 *Vaccine Immunol* [Internet]. 2008 Aug [cited 2021 Jun 21];15(8):1165–70. Available  
292 from: <https://journals.asm.org/journal/cvi>
- 293 44. Nie W, Wang J, Jing W, Shi W, Wang Q, Huang X, et al. Value of serum cytokine  
294 biomarkers TNF- $\alpha$ , IL-4, sIL-2R and IFN- $\gamma$  for use in monitoring bacterial load and  
295 anti-tuberculosis treatment progress. *Cytokine X*. 2020 Jun 1;2(2):100028.
- 296 45. Matsushita I, Hang NT Le, Hong LT, Tam DB, Lien LT, Thuong PH, et al. Dynamics  
297 of immune parameters during the treatment of active tuberculosis showing negative  
298 interferon gamma response at the time of diagnosis. *Int J Infect Dis* [Internet]. 2015  
299 Nov 1 [cited 2021 Jun 21];40:39–44. Available from:  
300 <http://dx.doi.org/10.1016/j.ijid.2015.09.021>
- 301 46. Mvungi HC, Mbelele PM, Buza JJ, Mpagama SG, Sauli E. Blood cytokine responses  
302 to early secreted protein antigen-6/culture filtrate protein-10 tuberculosis antigens 2  
303 months after antituberculosis treatment among patients with drug-susceptible  
304 pulmonary tuberculosis. *Int J Mycobacteriology* [Internet]. 2019 Jan 1 [cited 2021 Jun  
305 21];8(1):53–9. Available from: [https://www.ijmyco.org/article.asp?issn=2212-  
5531;year=2019;volume=8;issue=1;spage=53;epage=59;aulast=Mvungi](https://www.ijmyco.org/article.asp?issn=2212-5531;year=2019;volume=8;issue=1;spage=53;epage=59;aulast=Mvungi)
- 307 47. Gebremicael G, Alemayehu M, Sileshi M, Geto Z, Gebreegziabxier A, Tefera H, et al.  
308 The serum concentration of vitamin B12 as a biomarker of therapeutic response in  
309 tuberculosis patients with and without human immunodeficiency virus (HIV) infection.  
310 *Int J Gen Med* [Internet]. 2019 Sep 20 [cited 2021 Jun 20];12:353–61. Available from:  
311 <http://doi.org/10.2147/IJGM.S218799>
- 312 48. Anusiem CA, Okonkwo PO. The impact of treatment on the serum concentration of  
313 interleukin-1 beta in pulmonary tuberculosis. *Am J Ther* [Internet]. 2017 May 1 [cited  
314 2021 Jun 20];24(3):e329–32. Available from:  
315 [https://journals.lww.com/americantherapeutics/Fulltext/2017/05000/The\\_Impact\\_of\\_T  
316 reatment\\_on\\_the\\_Serum\\_Concentration.11.aspx](https://journals.lww.com/americantherapeutics/Fulltext/2017/05000/The_Impact_of_Treatment_on_the_Serum_Concentration.11.aspx)
- 317 49. Luo X, Wu F, Ma J, Xiao H, Cui H. Immunological recovery in patients with  
318 pulmonary tuberculosis after intensive phase treatment. *J Int Med Res* [Internet]. 2018  
319 Sep 1 [cited 2021 Jun 21];46(9):3539–51. Available from: [https://us.sagepub.com/en-  
320 us/nam/open-access-at-sage](https://us.sagepub.com/en-us/nam/open-access-at-sage)

- 321 50. Alzubaidi LKA, Alyasiri NS, Mehdi LY. Study the level of interleukin-2 during and  
322 after treatment in sputum of Iraqi patients with pulmonary tuberculosis. *Indian J Public*  
323 *Heal Res Dev*. 2019 Sep 1;10(9):746–51.
- 324 51. Feng JY, Ho LI, Chuang FY, Pan SW, Chen YY, Tung CL, et al. Depression and  
325 recovery of IL-17A secretion in mitogen responses in patients with active tuberculosis-  
326 a prospective observational study. *J Formos Med Assoc*. 2021 Apr 1;120(4):1080–9.
- 327 52. Kumar NP, Banurekha V V., Nair D, Babu S. Diminished plasma levels of common  $\gamma$ -  
328 chain cytokines in pulmonary tuberculosis and reversal following treatment. *PLoS One*  
329 [Internet]. 2017 Apr 1 [cited 2021 Jun 20];12(4):e0176495. Available from:  
330 <https://doi.org/10.1371/journal.pone.0176495>
- 331 53. Zhao G, Luo X, Han X, Liu Z. Combining bioinformatics and biological detection to  
332 identify novel biomarkers for diagnosis and prognosis of pulmonary tuberculosis.  
333 *Saudi Med J* [Internet]. 2020 Apr 1 [cited 2021 Jun 21];41(4):351–60. Available from:  
334 <http://orcid.org/0000-0002-5939-7140.www.smj.org.sa>
- 335 54. Zhu Y, Jia H, Chen J, Cui G, Gao H, Wei Y, et al. Decreased Osteopontin Expression  
336 as a Reliable Prognostic Indicator of Improvement in Pulmonary Tuberculosis: Impact  
337 of the Level of Interferon- $\gamma$ -Inducible Protein 10. *Cell Physiol Biochem* [Internet].  
338 2015 Nov 1 [cited 2021 Jun 21];37(5):1983–96. Available from:  
339 [www.karger.com/cpb1983](http://www.karger.com/cpb1983)
- 340 55. García-Basteiro AL, Mambuque E, Den Hertog A, Saavedra B, Cuamba I, Oliveras L,  
341 et al. IP-10 Kinetics in the First Week of Therapy are Strongly Associated with  
342 Bacteriological Confirmation of Tuberculosis Diagnosis in HIV-Infected Patients. *Sci*  
343 *Rep* [Internet]. 2017 Dec 1 [cited 2021 Jun 20];7(1):1–8. Available from:  
344 [www.nature.com/scientificreports/](http://www.nature.com/scientificreports/)
- 345 56. Hong JY, Lee HJ, Kim SY, Chung KS, Kim EY, Jung JY, et al. Efficacy of IP-10 as a  
346 biomarker for monitoring tuberculosis treatment. *J Infect* [Internet]. 2014 Mar 1 [cited  
347 2021 Jun 20];68(3):252–8. Available from:  
348 <http://www.journalofinfection.com/article/S0163445313003368/fulltext>
- 349 57. Kabeer BSA, Raja A, Raman B, Thangaraj S, Lepotier M, Ippolito G, et al. IP-10  
350 response to RD1 antigens might be a useful biomarker for monitoring tuberculosis  
351 therapy. *BMC Infect Dis* [Internet]. 2011 May 19 [cited 2021 Jun 20];11(1):1–9.  
352 Available from: <http://www.biomedcentral.com/1471-2334/11/135>
- 353 58. Kim SY, Kim J, Kim DR, Kang YA, Bong S, Lee J, et al. Urine IP-10 as a biomarker  
354 of therapeutic response in patients with active pulmonary tuberculosis. *BMC Infect Dis*  
355 [Internet]. 2018 May 29 [cited 2021 Jun 20];18(1):1–6. Available from:  
356 <https://doi.org/10.1186/s12879-018-3144-3>
- 357 59. Drain PK, Gounder L, Grobler A, Sahid F, Bassett I V., Moosa MYS. Urine  
358 lipoarabinomannan to monitor antituberculosis therapy response and predict mortality  
359 in an HIV-endemic region: A prospective cohort study. *BMJ Open* [Internet]. 2015 Apr  
360 1 [cited 2021 Jun 20];5(4):e006833. Available from: <http://bmjopen.bmj.com/>
- 361 60. Kawasaki M, Echiverri C, Raymond L, Cadena E, Reside E, Gler MT, et al.  
362 Lipoarabinomannan in sputum to detect bacterial load and treatment response in  
363 patients with pulmonary tuberculosis: Analytic validation and evaluation in two  
364 cohorts. *PLoS Med* [Internet]. 2019 [cited 2021 May 17];16(4):e1002780. Available  
365 from: <https://doi.org/10.1371/journal.pmed.1002780>
- 366 61. Wood R, Racow K, Bekker LG, Middelkoop K, Vogt M, Kreiswirth BN, et al.  
367 Lipoarabinomannan in urine during tuberculosis treatment: Association with host and  
368 pathogen factors and mycobacteriuria. *BMC Infect Dis* [Internet]. 2012 Feb 27 [cited  
369 2021 Jun 21];12(1):1–11. Available from: <http://www.biomedcentral.com/1471-2334/12/47>
- 370  
371 62. Feruglio SL, Trøseid M, Damås JK, Kvale D, Dyrhol-Riise AM. Soluble Markers of  
372 the Toll-Like Receptor 4 Pathway Differentiate between Active and Latent

- 373 Tuberculosis and Are Associated with Treatment Responses. PLoS One [Internet].  
374 2013 Jul 16 [cited 2021 Jun 20];8(7):e69896. Available from: [www.plosone.org](http://www.plosone.org)
- 375 63. Ugarte-Gil CA, Elkington P, Gilman RH, Coronel J, Tezera LB, Bernabe-Ortiz A, et  
376 al. Induced Sputum MMP-1, -3 & -8 Concentrations during Treatment of Tuberculosis.  
377 PLoS One [Internet]. 2013 Apr 22 [cited 2021 Jun 21];8(4):e61333. Available from:  
378 [www.plosone.org](http://www.plosone.org)
- 379 64. Osawa T, Watanabe M, Morimoto K, Okumura M, Yoshiyama T, Ogata H, et al.  
380 Serum procalcitonin levels predict mortality risk in patients with pulmonary  
381 tuberculosis: A single-center prospective observational study. J Infect Dis [Internet].  
382 2020 Nov 15 [cited 2021 Jun 21];222(10):1651–4. Available from:  
383 <https://academic.oup.com/jid/article/222/10/1651/5843442>
- 384 65. Barry SE, Ellis M, Yang YR, Guan G, Wang X, Britton WJ, et al. Identification of a  
385 plasma microRNA profile in untreated pulmonary tuberculosis patients that is  
386 modulated by anti-mycobacterial therapy. J Infect [Internet]. 2018 Oct 1 [cited 2021  
387 Jun 20];77(4):341–8. Available from:  
388 <http://www.journalofinfection.com/article/S0163445318301221/fulltext>
- 389 66. Honeyborne I, Lipman MC, Eckold C, Evangelopoulos D, Gillespie SH, Pym A, et al.  
390 Effective anti-tuberculosis therapy correlates with plasma small RNA [Internet]. Vol.  
391 45, European Respiratory Journal. European Respiratory Society; 2015 [cited 2021 Jun  
392 20]. p. 1741–4. Available from: <http://ow.ly/IxOaD>
- 393 67. Rabna P, Andersen A, Wejse C, Oliveira I, Gomes VF, Haaland MB, et al. Utility of  
394 the Plasma Level of suPAR in Monitoring Risk of Mortality during TB Treatment.  
395 PLoS One [Internet]. 2012 Aug 28 [cited 2021 Jun 21];7(8):e43933. Available from:  
396 [www.plosone.org](http://www.plosone.org)
- 397 68. Mardining Raras TY, Noor Chozin I. The Soluble Plasminogen Activator Receptor as  
398 a Biomarker on Monitoring the Therapy Progress of Pulmonary TB-AFB(+) Patients .  
399 Tuberc Res Treat. 2010;2010:1–6.
- 400 69. Ronacher K, Chegou NN, Kleynhans L, Djoba Siawaya JF, du Plessis N, Loxton AG,  
401 et al. Distinct serum biosignatures are associated with different tuberculosis treatment  
402 outcomes. Tuberculosis. 2019 Sep 1;118:101859.
- 403 70. Bloom CI, Graham CM, Berry MPR, Wilkinson KA, Oni T, Rozakeas F, et al.  
404 Detectable Changes in The Blood Transcriptome Are Present after Two Weeks of  
405 Antituberculosis Therapy. PLoS One [Internet]. 2012 Oct 2 [cited 2021 May  
406 4];7(10):e46191. Available from: [www.plosone.org](http://www.plosone.org)
- 407 71. Darboe F, Mbandi SK, Naidoo K, Yende-Zuma N, Lewis L, Thompson EG, et al.  
408 Detection of tuberculosis recurrence, diagnosis and treatment response by a blood  
409 transcriptomic risk signature in HIV-infected persons on antiretroviral therapy. Front  
410 Microbiol [Internet]. 2019 Jun 26 [cited 2021 Jun 22];10(JUN):1441. Available from:  
411 [www.frontiersin.org](http://www.frontiersin.org)
- 412 72. Gebremicael G, Kassa D, Alemayehu Y, Gebreegziavier A, Kassahun Y, van Baarle  
413 D, et al. Gene expression profiles classifying clinical stages of tuberculosis and  
414 monitoring treatment responses in Ethiopian HIV-negative and HIV-positive cohorts.  
415 PLoS One [Internet]. 2019 Dec 1 [cited 2021 Jun 20];14(12):e0226137. Available  
416 from: <https://doi.org/10.1371/journal.pone.0226137>
- 417 73. Penn-Nicholson A, Mbandi SK, Thompson E, Mendelsohn SC, Suliman S, Chegou  
418 NN, et al. RISK6, a 6-gene transcriptomic signature of TB disease risk, diagnosis and  
419 treatment response. Sci Rep [Internet]. 2020 Dec 1 [cited 2021 May 4];10(1):1–21.  
420 Available from: <https://doi.org/10.1038/s41598-020-65043-8>
- 421 74. Sivakumaran D, Jenum S, Vaz M, Selvam S, Ottenhoff THM, Haks MC, et al.  
422 Combining host-derived biomarkers with patient characteristics improves signature  
423 performance in predicting tuberculosis treatment outcomes. Commun Biol [Internet].  
424 2020 Dec 1 [cited 2021 Jun 21];3(1):1–10. Available from:

- 425 <https://doi.org/10.1038/s42003-020-1087-x>
- 426 75. Warsinske HC, Rao AM, Moreira FMF, Santos PCP, Liu AB, Scott M, et al.  
427 Assessment of Validity of a Blood-Based 3-Gene Signature Score for Progression and  
428 Diagnosis of Tuberculosis, Disease Severity, and Treatment Response. *JAMA Netw*  
429 *open*. 2018;1(6):e183779.
- 430 76. Kumar NP, Banurekha V V., Nair D, Babu S. Circulating angiogenic factors as  
431 biomarkers of disease severity and bacterial burden in pulmonary tuberculosis. *PLoS*  
432 *One* [Internet]. 2016 Jan 4 [cited 2021 Jun 21];11(1):e0146318. Available from:  
433 <https://journals.plos.org/plosone/article?id=10.1371/journal.pone.0146318>
- 434 77. Chetid C, Kokhraidze E, Tukvadze N, Banu S, Uddin MKM, Biswas S, et al.  
435 Association of baseline white blood cell counts with tuberculosis treatment outcome: a  
436 prospective multicentered cohort study. *Int J Infect Dis* [Internet]. 2020 Nov 1 [cited  
437 2021 Jun 20];100:199–206. Available from:  
438 <http://creativecommons.org/licenses/by/4.0/>
- 439
